# Supplementary material for: Genomic insights into the clonal reproductive Opuntia cochenillifera: mitochondrial and chloroplast genomes of the cochineal cactus for enhanced understanding of structural dynamics and evolutionary implications
Source: Front Plant Sci. 2024 Mar 7;15:1347945. doi: 10.3389/fpls.2024.1347945 (PMC10954886; doi:10.3389/fpls.2024.1347945)
Supplement: Supplementary file 8 [file Table_4.xlsx]

## Sheet: Dispersed_repeats
Table S4 Dispersed repeat sequences in the mitochondrial genome of O. cochenillifera
The repeat length of the first part	The starting site of the first part	Matching direction	The repeat length of the second part	The starting site of the second part	Interval distance of repeats	E-value
13272	201141	F	13272	439964	-3	0
13248	201165	F	13248	439988	0	0
10136	708315	F	10136	1085339	0	0
5942	586123	F	5942	1127278	0	0
751	155551	F	751	675722	-2	0
671	155631	F	671	675802	-1	0
656	155646	F	656	675817	0	0
349	201364	P	349	325234	-1	2.99e-196
349	325234	P	349	440187	-1	2.99e-196
306	690622	P	306	885779	0	2.21e-173
243	730811	F	243	1104199	0	1.88e-135
229	156745	F	229	903515	0	5.05e-127
226	201487	P	226	325234	0	3.23e-125
225	170226	F	225	910388	0	1.29e-124
237	593110	F	237	1134109	-3	4.56e-124
236	593493	F	236	1134492	-3	1.8e-123
203	261058	F	203	1018057	0	2.28e-111
193	593536	F	193	1134535	-2	3.98e-100
183	558259	P	183	828490	0	2.5e-99
185	749802	F	185	876417	-1	8.68e-98
184	593545	F	184	1134544	-1	3.45e-97
183	373620	P	183	521682	-3	6.79e-92
180	703097	F	180	876082	-3	4.13e-90
174	593173	F	174	1134172	-2	8.88e-89
173	373612	P	173	521700	-2	3.51e-88
168	108598	F	168	422318	-1	1.35e-87
172	703089	F	172	876074	-2	1.39e-87
174	474904	F	174	678919	-3	1.53e-86
169	374024	P	169	519991	-3	1.43e-83
166	593042	F	166	1134041	-3	8.69e-82
155	684515	F	155	828440	-1	8.38e-80
149	108617	F	149	422337	0	7.38e-79
159	593079	F	159	1134078	-3	1.25e-77
157	304833	F	157	435039	-3	1.92e-76
157	373972	P	157	520055	-3	1.92e-76
151	592958	F	151	1133957	-3	7.01e-73
142	686208	P	142	744903	-1	5.15e-72
145	474938	F	145	678953	-2	1.78e-71
148	374075	P	148	519961	-3	4.22e-71
136	609609	F	136	1156099	0	4.95e-71
142	304848	F	142	435054	-2	1.09e-69
138	593209	F	138	1134208	-1	1.28e-69
133	152240	P	133	209631	0	3.17e-69
133	152240	P	133	448454	0	3.17e-69
144	374099	P	144	519941	-3	9.95e-69
132	618865	P	132	903459	0	1.27e-68
143	641974	P	143	703309	-3	3.9e-68
141	592066	F	141	1133221	-3	5.97e-67
125	614347	F	125	872487	0	2.08e-64
124	90264	F	124	1027549	0	8.31e-64
135	373963	P	135	520086	-3	2.15e-63
134	861805	F	134	1005828	-3	8.39e-63
122	325461	P	122	440187	0	1.33e-62
132	592608	F	132	1133603	-3	1.28e-61
131	265927	P	131	835251	-3	5.02e-61
131	592947	F	131	1133946	-3	5.02e-61
125	12045	P	125	655337	-2	1.45e-59
124	592616	F	124	1133611	-2	5.71e-59
127	458413	P	127	878273	-3	1.17e-58
115	593614	F	115	1134613	0	2.18e-58
126	458448	P	126	878239	-3	4.57e-58
125	375164	P	125	1148914	-3	1.78e-57
119	861820	F	119	1005843	-2	5.38e-56
111	525690	F	111	681679	0	5.58e-56
115	494199	P	115	878590	-1	7.52e-56
108	593239	F	108	1134238	0	3.57e-54
119	373955	P	119	520110	-3	6.29e-54
106	749881	F	106	876496	0	5.71e-53
113	374130	P	113	519941	-2	1.99e-52
105	823248	F	105	975484	0	2.28e-52
104	494210	P	104	878590	0	9.14e-52
114	558337	P	114	684556	-3	5.66e-51
102	154680	P	102	697450	0	1.46e-50
101	343514	P	101	525224	0	5.85e-50
105	861834	F	105	1005857	-1	7.2e-50
100	618997	P	100	903363	0	2.34e-49
110	304801	F	110	435007	-3	1.3e-48
98	165051	P	98	591335	0	3.74e-48
98	165051	P	98	1132490	0	3.74e-48
109	643644	F	109	921073	-3	5.06e-48
101	533161	F	101	928727	-1	1.77e-47
108	211196	P	108	907224	-3	1.97e-47
108	450019	P	108	907224	-3	1.97e-47
96	488861	F	96	856527	0	5.99e-47
99	397190	F	99	601149	-1	2.78e-46
106	641956	P	106	703364	-3	2.98e-46
94	418810	P	94	613858	0	9.58e-46
97	304893	F	97	435099	-1	4.36e-45
104	643658	F	104	921087	-3	4.49e-45
92	339601	P	92	949340	0	1.53e-44
94	317891	F	94	906634	-1	2.7e-43
100	494001	P	100	1099546	-3	1.02e-42
100	643965	F	100	921398	-3	1.02e-42
95	265963	P	95	835251	-2	9.63e-42
98	592140	F	98	1133295	-3	1.54e-41
98	862051	F	98	1006074	-3	1.54e-41
91	21464	P	91	779742	-1	1.67e-41
96	374175	F	96	878129	-3	2.31e-40
85	212226	P	85	906867	0	2.51e-40
85	393993	F	85	949396	0	2.51e-40
85	451049	P	85	906867	0	2.51e-40
92	593359	F	92	1134358	-2	5.78e-40
94	304361	F	94	1015276	-3	3.47e-39
90	862059	F	90	1006082	-2	8.84e-39
93	266060	P	93	835156	-3	1.34e-38
93	913641	F	93	1018744	-3	1.34e-38
82	187568	P	82	224345	0	1.61e-38
86	589373	F	86	1038056	-1	1.62e-38
86	1038056	F	86	1130528	-1	1.62e-38
89	211215	P	89	907224	-2	3.46e-38
89	450038	P	89	907224	-2	3.46e-38
92	304377	F	92	1015292	-3	5.2e-38
81	154062	F	81	1044190	0	6.43e-38
81	283829	F	81	292854	0	6.43e-38
81	471999	P	81	680244	0	6.43e-38
88	494013	P	88	1099546	-2	1.35e-37
91	979999	P	91	1152034	-3	2.01e-37
91	980067	P	91	1151966	-3	2.01e-37
84	579673	F	84	1061025	-1	2.53e-37
80	6740	F	80	63983	0	2.57e-37
80	394033	F	80	565861	0	2.57e-37
79	11914	P	79	655509	0	1.03e-36
79	90257	F	79	409083	0	1.03e-36
79	659746	F	79	1060252	0	1.03e-36
82	862067	F	82	1006090	-1	3.96e-36
78	304912	F	78	435118	0	4.12e-36
85	643980	F	85	921413	-2	8.07e-36
85	862354	F	85	1006349	-2	8.07e-36
81	862263	F	81	1006267	-1	1.56e-35
84	593350	F	84	1134349	-2	3.15e-35
87	593457	F	87	1134456	-3	4.49e-35
87	642081	P	87	703258	-3	4.49e-35
80	592660	F	80	1133655	-1	6.17e-35
76	156745	P	76	618865	0	6.59e-35
76	589383	F	76	1038066	0	6.59e-35
76	772833	P	76	930486	0	6.59e-35
76	1038066	F	76	1130538	0	6.59e-35
83	70017	P	83	200339	-2	1.23e-34
83	578107	F	83	695593	-2	1.23e-34
83	592752	F	83	1133747	-2	1.23e-34
86	265995	P	86	835228	-3	1.74e-34
86	297723	F	86	610446	-3	1.74e-34
86	913665	F	86	1018768	-3	1.74e-34
79	592871	F	79	1133871	-1	2.44e-34
75	160218	F	75	491499	0	2.63e-34
75	579682	F	75	1061034	0	2.63e-34
82	694744	P	82	1057433	-2	4.81e-34
78	325049	P	78	460109	-1	9.63e-34
74	198494	F	74	959872	0	1.05e-33
74	209759	F	74	1106444	0	1.05e-33
74	448582	F	74	1106444	0	1.05e-33
77	297732	F	77	610455	-1	3.8e-33
80	373324	F	80	1080409	-2	7.32e-33
83	642092	P	83	703251	-3	9.97e-33
76	54732	F	76	915913	-1	1.5e-32
76	373534	P	76	521884	-1	1.5e-32
72	409090	F	72	1027549	0	1.69e-32
79	949333	P	79	1057462	-2	2.85e-32
82	98202	F	82	326066	-3	3.84e-32
82	210549	P	82	907904	-3	3.84e-32
82	211110	P	82	907339	-3	3.84e-32
82	304322	F	82	1015237	-3	3.84e-32
82	449372	P	82	907904	-3	3.84e-32
82	449933	P	82	907339	-3	3.84e-32
75	834961	P	75	1009863	-1	5.93e-32
81	304909	F	81	618521	-3	1.48e-31
81	375212	P	81	1148910	-3	1.48e-31
81	592847	F	81	1133847	-3	1.48e-31
74	265984	P	74	835251	-1	2.34e-31
70	198369	P	70	1125247	0	2.7e-31
70	494922	P	70	949389	0	2.7e-31
77	210821	P	77	907639	-2	4.34e-31
77	374194	F	77	878148	-2	4.34e-31
77	449644	P	77	907639	-2	4.34e-31
80	6742	P	80	925219	-3	5.71e-31
80	304405	F	80	1015320	-3	5.71e-31
80	375131	P	80	1148992	-3	5.71e-31
80	425856	P	80	1037679	-3	5.71e-31
80	435118	F	80	618524	-3	5.71e-31
69	90320	F	69	198501	0	1.08e-30
69	109248	P	69	321660	0	1.08e-30
69	592671	F	69	1133666	0	1.08e-30
76	126359	P	76	1039734	-2	1.69e-30
79	34265	F	79	886631	-3	2.2e-30
79	375235	P	79	1148889	-3	2.2e-30
79	520006	P	79	878050	-3	2.2e-30
68	198501	F	68	1027605	0	4.32e-30
68	311255	F	68	856738	0	4.32e-30
78	63985	P	78	925221	-3	8.46e-30
78	87915	F	78	202258	-3	8.46e-30
78	87915	F	78	441081	-3	8.46e-30
78	304350	F	78	1015265	-3	8.46e-30
78	695977	P	78	778548	-3	8.46e-30
71	50117	P	71	412378	-1	1.44e-29
71	266082	P	71	835156	-1	1.44e-29
71	610120	P	71	979752	-1	1.44e-29
67	59125	P	67	835892	0	1.73e-29
67	90320	F	67	959879	0	1.73e-29
67	343076	P	67	956008	0	1.73e-29
67	438923	F	67	989715	0	1.73e-29
67	959879	F	67	1027605	0	1.73e-29
74	642121	P	74	703231	-2	2.56e-29
66	253902	F	66	949477	0	6.91e-29
66	472094	P	66	680164	0	6.91e-29
69	198391	F	69	253835	-1	2.23e-28
65	6811	F	65	6839	0	2.76e-28
65	156685	F	65	903443	0	2.76e-28
65	817045	F	65	1071842	0	2.76e-28
72	54287	F	72	1099077	-2	3.88e-28
72	339621	F	72	1057462	-2	3.88e-28
68	253827	F	68	949278	-1	8.81e-28
68	856744	F	68	1032690	-1	8.81e-28
64	677233	P	64	925235	0	1.1e-27
74	641896	P	74	703456	-3	1.84e-27
74	862180	F	74	1006193	-3	1.84e-27
74	980028	P	74	1152022	-3	1.84e-27
63	266090	P	63	835156	0	4.42e-27
63	393993	P	63	494922	0	4.42e-27
63	847503	F	63	925290	0	4.42e-27
70	592168	F	70	1133323	-2	5.86e-27
70	766375	F	70	886780	-2	5.86e-27
73	179276	P	73	801434	-3	7.08e-27
73	210985	P	73	907470	-3	7.08e-27
73	449808	P	73	907470	-3	7.08e-27
66	191492	F	66	733720	-1	1.37e-26
62	311261	F	62	1032690	0	1.77e-26
62	418919	F	62	427114	0	1.77e-26
68	10632	F	68	971578	-2	8.85e-26
71	98184	F	71	326048	-3	1.04e-25
71	328056	F	71	685652	-3	1.04e-25
71	369374	F	71	1072945	-3	1.04e-25
71	412378	F	71	1032686	-3	1.04e-25
64	191637	F	64	733846	-1	2.12e-25
64	834901	P	64	1009938	-1	2.12e-25
60	198400	F	60	253844	0	2.83e-25
60	339633	F	60	1057474	0	2.83e-25
60	647032	F	60	866328	0	2.83e-25
67	980091	P	67	1151966	-2	3.44e-25
70	39812	F	70	326026	-3	3.99e-25
70	54183	F	70	1098972	-3	3.99e-25
70	425487	P	70	1038073	-3	3.99e-25
70	659912	F	70	1060411	-3	3.99e-25
63	160194	P	63	764997	-1	8.35e-25
63	210835	P	63	907639	-1	8.35e-25
63	449658	P	63	907639	-1	8.35e-25
63	618237	P	63	727573	-1	8.35e-25
59	21496	P	59	779742	0	1.13e-24
59	300218	F	59	309205	0	1.13e-24
59	393949	F	59	934081	0	1.13e-24
66	6740	F	66	677231	-2	1.33e-24
66	63983	F	66	677231	-2	1.33e-24
69	425488	P	69	589390	-3	1.53e-24
69	425488	P	69	1130545	-3	1.53e-24
69	436738	P	69	999054	-3	1.53e-24
62	54297	F	62	1099087	-1	3.29e-24
58	119805	P	58	153609	0	4.53e-24
58	201562	P	58	709044	0	4.53e-24
58	201562	P	58	1086068	0	4.53e-24
58	325327	F	58	709044	0	4.53e-24
58	325327	F	58	1086068	0	4.53e-24
58	440385	P	58	709044	0	4.53e-24
58	440385	P	58	1086068	0	4.53e-24
65	30475	F	65	652399	-2	5.17e-24
65	833134	F	65	997078	-2	5.17e-24
68	304893	F	68	618505	-3	5.84e-24
68	783099	P	68	951729	-3	5.84e-24
68	862026	F	68	1006049	-3	5.84e-24
61	211243	P	61	907224	-1	1.29e-23
61	323869	F	61	1037482	-1	1.29e-23
61	450066	P	61	907224	-1	1.29e-23
61	519948	P	61	878129	-1	1.29e-23
61	592774	F	61	1133769	-1	1.29e-23
57	50116	P	57	856755	0	1.81e-23
64	160566	P	64	764622	-2	2e-23
64	356107	F	64	578011	-2	2e-23
67	35069	F	67	1017861	-3	2.23e-23
67	50122	P	67	1032685	-3	2.23e-23
67	160713	P	67	764478	-3	2.23e-23
67	417843	P	67	681269	-3	2.23e-23
67	417862	P	67	681250	-3	2.23e-23
67	436579	P	67	999233	-3	2.23e-23
60	198391	F	60	949286	-1	5.09e-23
60	373895	P	60	521521	-1	5.09e-23
60	374118	F	60	878069	-1	5.09e-23
60	375096	P	60	1149047	-1	5.09e-23
56	393961	F	56	428049	0	7.24e-23
56	412393	F	56	1032701	0	7.24e-23
56	745542	F	56	1155314	0	7.24e-23
56	819270	F	56	1060161	0	7.24e-23
63	211129	P	63	907339	-2	7.77e-23
63	412382	P	63	524362	-2	7.77e-23
63	449952	P	63	907339	-2	7.77e-23
66	425837	P	66	1037712	-3	8.53e-23
59	89438	P	59	792239	-1	2e-22
59	141779	F	59	791990	-1	2e-22
55	80585	P	55	535830	0	2.9e-22
62	50122	F	62	524363	-2	3.01e-22
62	82522	P	62	538694	-2	3.01e-22
62	84820	F	62	842964	-2	3.01e-22
62	493879	P	62	1099680	-2	3.01e-22
62	659920	F	62	1060419	-2	3.01e-22
62	766172	P	62	924711	-2	3.01e-22
62	1061645	F	62	1097551	-2	3.01e-22
65	17491	F	65	817047	-3	3.26e-22
65	160802	P	65	764399	-3	3.26e-22
65	339649	P	65	1027528	-3	3.26e-22
65	428049	P	65	1057558	-3	3.26e-22
65	459556	F	65	899709	-3	3.26e-22
58	162463	P	58	190385	-1	7.88e-22
58	643486	F	58	920881	-1	7.88e-22
54	188107	P	54	941053	0	1.16e-21
54	862095	F	54	1006118	0	1.16e-21
54	862200	F	54	1006213	0	1.16e-21
61	113665	P	61	362078	-2	1.16e-21
61	266205	P	61	1057454	-2	1.16e-21
61	696005	P	61	778537	-2	1.16e-21
64	6879	P	64	612567	-3	1.24e-21
64	90244	F	64	266279	-3	1.24e-21
64	90244	P	64	1057490	-3	1.24e-21
64	817047	P	64	1038252	-3	1.24e-21
60	179289	P	60	801434	-2	4.51e-21
60	425876	P	60	1037679	-2	4.51e-21
53	168528	P	53	610740	0	4.63e-21
53	204114	F	53	681142	0	4.63e-21
53	229975	F	53	843990	0	4.63e-21
53	239377	F	53	744411	0	4.63e-21
53	266205	P	53	339621	0	4.63e-21
53	266205	F	53	949359	0	4.63e-21
53	279542	P	53	876332	0	4.63e-21
53	442937	F	53	681142	0	4.63e-21
53	933996	P	53	1057502	0	4.63e-21
63	17491	F	63	1071844	-3	4.74e-21
63	266195	P	63	339621	-3	4.74e-21
63	266195	F	63	949349	-3	4.74e-21
63	835037	P	63	1009769	-3	4.74e-21
63	1038253	P	63	1071844	-3	4.74e-21
56	412393	F	56	856755	-1	1.22e-20
56	629535	P	56	967539	-1	1.22e-20
56	833143	F	56	997087	-1	1.22e-20
59	373744	P	59	521682	-2	1.74e-20
59	784260	P	59	1019684	-2	1.74e-20
62	311261	F	62	412382	-3	1.81e-20
62	412382	F	62	856744	-3	1.81e-20
62	622605	F	62	861727	-3	1.81e-20
62	642207	P	62	703157	-3	1.81e-20
62	642207	P	62	876142	-3	1.81e-20
52	17504	F	52	817060	0	1.85e-20
52	231377	F	52	901002	0	1.85e-20
52	264597	F	52	731935	0	1.85e-20
52	595835	F	52	1068892	0	1.85e-20
52	701221	F	52	806465	0	1.85e-20
55	210305	P	55	908648	-1	4.78e-20
55	449128	P	55	908648	-1	4.78e-20
55	471059	P	55	487214	-1	4.78e-20
55	980103	P	55	1151966	-1	4.78e-20
58	154005	F	58	1044125	-2	6.73e-20
58	245951	F	58	283256	-2	6.73e-20
58	610021	P	58	979871	-2	6.73e-20
61	89351	P	61	792324	-3	6.87e-20
61	126802	F	61	1069493	-3	6.87e-20
61	328094	F	61	685690	-3	6.87e-20
61	517141	P	61	889831	-3	6.87e-20
51	50122	P	51	311272	0	7.42e-20
51	72355	P	51	233216	0	7.42e-20
51	198400	F	51	949295	0	7.42e-20
51	211253	P	51	907224	0	7.42e-20
51	311272	F	51	412393	0	7.42e-20
51	432759	F	51	438633	0	7.42e-20
51	450076	P	51	907224	0	7.42e-20
51	610140	P	51	979752	0	7.42e-20
51	675368	F	51	1049544	0	7.42e-20
54	873191	F	54	953294	-1	1.88e-19
57	436605	P	57	999217	-2	2.6e-19
60	34350	F	60	886720	-3	2.61e-19
60	622620	F	60	861742	-3	2.61e-19
60	659901	F	60	1060400	-3	2.61e-19
50	17504	F	50	1071857	0	2.97e-19
50	480892	P	50	872398	0	2.97e-19
50	734565	P	50	1033762	0	2.97e-19
53	82531	P	53	538694	-1	7.37e-19
53	156942	F	53	712594	-1	7.37e-19
53	156942	F	53	1089618	-1	7.37e-19
59	89364	P	59	792313	-3	9.93e-19
59	113684	P	59	362061	-3	9.93e-19
59	304801	F	59	618408	-3	9.93e-19
59	417829	P	59	681291	-3	9.93e-19
59	815720	P	59	1122113	-3	9.93e-19
59	885100	P	59	909495	-3	9.93e-19
56	6887	P	56	612567	-2	1e-18
56	304429	F	56	1015344	-2	1e-18
49	89448	P	49	792239	0	1.19e-18
49	156701	P	49	618948	0	1.19e-18
49	198420	F	49	959854	0	1.19e-18
49	198438	F	49	266235	0	1.19e-18
49	369280	F	49	1072853	0	1.19e-18
49	373906	P	49	521521	0	1.19e-18
49	397240	F	49	601199	0	1.19e-18
49	485164	P	49	524815	0	1.19e-18
52	160578	P	52	764622	-1	2.89e-18
52	659930	F	52	1060429	-1	2.89e-18
58	212027	P	58	907097	-3	3.77e-18
58	328113	F	58	685709	-3	3.77e-18
58	450850	P	58	907097	-3	3.77e-18
55	160812	P	55	764399	-2	3.87e-18
55	216801	P	55	672829	-2	3.87e-18
55	393254	F	55	857835	-2	3.87e-18
55	516650	P	55	857266	-2	3.87e-18
48	338299	F	48	851863	0	4.75e-18
48	374130	F	48	878081	0	4.75e-18
48	519961	P	48	878129	0	4.75e-18
48	1061659	F	48	1097565	0	4.75e-18
51	707268	P	51	1024788	-1	1.13e-17
51	952765	F	51	964076	-1	1.13e-17
57	327669	F	57	676631	-3	1.43e-17
57	393960	P	57	1057567	-3	1.43e-17
57	885666	P	57	909389	-3	1.43e-17
54	194437	P	54	233309	-2	1.49e-17
54	210973	P	54	907501	-2	1.49e-17
54	211004	P	54	907470	-2	1.49e-17
54	375322	P	54	1148838	-2	1.49e-17
54	449796	P	54	907501	-2	1.49e-17
54	449827	P	54	907470	-2	1.49e-17
54	641916	P	54	703456	-2	1.49e-17
54	642063	P	54	703309	-2	1.49e-17
47	16188	F	47	393449	0	1.9e-17
47	79696	P	47	739572	0	1.9e-17
47	109428	F	47	988023	0	1.9e-17
47	162474	P	47	190385	0	1.9e-17
47	216851	P	47	672785	0	1.9e-17
47	428049	F	47	934093	0	1.9e-17
47	694779	P	47	1057433	0	1.9e-17
47	749701	F	47	876378	0	1.9e-17
47	1038269	P	47	1071844	0	1.9e-17
50	39832	F	50	326046	-1	4.45e-17
50	796155	P	50	995538	-1	4.45e-17
56	54261	F	56	1099051	-3	5.42e-17
56	160164	F	56	491450	-3	5.42e-17
56	328075	F	56	685671	-3	5.42e-17
56	783168	P	56	951672	-3	5.42e-17
53	938714	F	53	978019	-2	5.75e-17
46	11996	P	46	655465	0	7.59e-17
46	74195	P	46	677229	0	7.59e-17
46	339591	P	46	409146	0	7.59e-17
46	412604	P	46	1121180	0	7.59e-17
49	245960	F	49	283265	-1	1.74e-16
49	374194	P	49	519941	-1	1.74e-16
49	475121	F	49	679170	-1	1.74e-16
49	578141	F	49	695627	-1	1.74e-16
55	375331	P	55	1148828	-3	2.05e-16
55	642222	P	55	703149	-3	2.05e-16
55	642222	P	55	876134	-3	2.05e-16
55	783153	P	55	951688	-3	2.05e-16
52	160397	P	52	764791	-2	2.21e-16
52	458522	P	52	878239	-2	2.21e-16
52	524362	P	52	1032701	-2	2.21e-16
52	980158	P	52	1151909	-2	2.21e-16
45	6775	P	45	925285	0	3.04e-16
45	64018	P	45	925285	0	3.04e-16
45	200269	F	45	1008992	0	3.04e-16
45	251796	F	45	933996	0	3.04e-16
45	251796	P	45	1057510	0	3.04e-16
45	565861	F	45	949436	0	3.04e-16
48	253835	P	48	1125247	-1	6.83e-16
48	470424	P	48	735369	-1	6.83e-16
48	949286	P	48	1125247	-1	6.83e-16
54	169063	F	54	926979	-3	7.76e-16
54	885709	P	54	909349	-3	7.76e-16
51	169315	P	51	246522	-2	8.51e-16
51	311272	P	51	524363	-2	8.51e-16
51	471581	P	51	680756	-2	8.51e-16
51	524363	P	51	856755	-2	8.51e-16
44	6740	P	44	74195	0	1.21e-15
44	63983	P	44	74195	0	1.21e-15
44	198451	P	44	1057593	0	1.21e-15
44	210854	P	44	907639	0	1.21e-15
44	232574	P	44	906736	0	1.21e-15
44	266192	F	44	266305	0	1.21e-15
44	266194	F	44	694733	0	1.21e-15
44	449677	P	44	907639	0	1.21e-15
44	534090	F	44	961442	0	1.21e-15
44	781951	P	44	851940	0	1.21e-15
47	82920	F	47	233637	-1	2.68e-15
47	90339	P	47	780394	-1	2.68e-15
47	198520	P	47	780394	-1	2.68e-15
47	565858	P	47	899368	-1	2.68e-15
47	701087	P	47	1154764	-1	2.68e-15
47	780394	P	47	959898	-1	2.68e-15
47	780394	P	47	1027624	-1	2.68e-15
47	784272	P	47	1019684	-1	2.68e-15
53	393920	F	53	694704	-3	2.93e-15
53	409070	P	53	1097966	-3	2.93e-15
53	409081	F	53	949331	-3	2.93e-15
53	436709	P	53	999099	-3	2.93e-15
53	436763	P	53	999045	-3	2.93e-15
53	526276	F	53	734518	-3	2.93e-15
50	435062	F	50	618468	-2	3.27e-15
50	475636	F	50	679869	-2	3.27e-15
43	141898	F	43	792115	0	4.86e-15
43	209968	P	43	909064	0	4.86e-15
43	238584	F	43	1149534	0	4.86e-15
43	339601	F	43	494949	0	4.86e-15
43	409071	P	43	494961	0	4.86e-15
43	448791	P	43	909064	0	4.86e-15
43	657147	P	43	712301	0	4.86e-15
43	657147	P	43	1089325	0	4.86e-15
43	834993	P	43	1009863	0	4.86e-15
43	861896	F	43	1005919	0	4.86e-15
46	98238	F	46	326102	-1	1.05e-14
46	179303	P	46	801434	-1	1.05e-14
46	181320	F	46	216179	-1	1.05e-14
46	198331	P	46	484208	-1	1.05e-14
46	425528	P	46	1038056	-1	1.05e-14
52	90244	F	52	933997	-3	1.11e-14
52	146798	P	52	803446	-3	1.11e-14
52	471670	P	52	680653	-3	1.11e-14
52	612566	P	52	780417	-3	1.11e-14
52	885701	P	52	909359	-3	1.11e-14
49	126824	F	49	1069515	-2	1.26e-14
49	490449	P	49	620655	-2	1.26e-14
42	74195	F	42	925257	0	1.94e-14
42	266307	F	42	694733	0	1.94e-14
42	323888	F	42	1037501	0	1.94e-14
42	342377	F	42	1142884	0	1.94e-14
42	420526	F	42	420560	0	1.94e-14
42	461704	P	42	730744	0	1.94e-14
42	592793	F	42	1133788	0	1.94e-14
42	613955	F	42	911988	0	1.94e-14
45	34365	F	45	886735	-1	4.1e-14
45	160751	P	45	764462	-1	4.1e-14
45	214557	P	45	1081156	-1	4.1e-14
45	516660	P	45	857266	-1	4.1e-14
45	643813	F	45	921255	-1	4.1e-14
51	6892	F	51	780417	-3	4.17e-14
51	17504	P	51	1038252	-3	4.17e-14
51	90257	F	51	949333	-3	4.17e-14
51	98454	F	51	326315	-3	4.17e-14
51	211309	P	51	907168	-3	4.17e-14
51	266195	P	51	1057474	-3	4.17e-14
51	266292	F	51	409083	-3	4.17e-14
51	409083	P	51	1057490	-3	4.17e-14
51	450132	P	51	907168	-3	4.17e-14
51	475281	F	51	679422	-3	4.17e-14
48	191557	F	48	733779	-2	4.82e-14
48	297813	F	48	610536	-2	4.82e-14
48	324839	F	48	490320	-2	4.82e-14
48	783182	P	48	951666	-2	4.82e-14
48	871888	F	48	1037071	-2	4.82e-14
41	30896	F	41	952894	0	7.78e-14
41	54318	F	41	1099108	0	7.78e-14
41	97612	P	41	961441	0	7.78e-14
41	230251	P	41	863226	0	7.78e-14
41	231633	P	41	709257	0	7.78e-14
41	231633	P	41	1086281	0	7.78e-14
41	342376	P	41	393893	0	7.78e-14
41	460458	F	41	744020	0	7.78e-14
41	471073	P	41	487214	0	7.78e-14
41	620022	P	41	877389	0	7.78e-14
50	94927	F	50	425186	-3	1.57e-13
50	201952	P	50	712530	-3	1.57e-13
50	201952	P	50	1089554	-3	1.57e-13
50	210746	P	50	907736	-3	1.57e-13
50	256967	F	50	419244	-3	1.57e-13
50	304856	F	50	618468	-3	1.57e-13
50	374079	F	50	878030	-3	1.57e-13
50	440775	P	50	712530	-3	1.57e-13
50	440775	P	50	1089554	-3	1.57e-13
50	449569	P	50	907736	-3	1.57e-13
44	198481	F	44	266222	-1	1.6e-13
44	371508	F	44	460873	-1	1.6e-13
44	394033	P	44	899368	-1	1.6e-13
44	437754	F	44	938526	-1	1.6e-13
44	592194	F	44	1133349	-1	1.6e-13
44	595016	P	44	1100209	-1	1.6e-13
44	899368	P	44	949436	-1	1.6e-13
47	308245	F	47	434537	-2	1.85e-13
47	644073	F	47	921514	-2	1.85e-13
40	6775	P	40	847503	0	3.11e-13
40	17451	F	40	17514	0	3.11e-13
40	17451	F	40	817070	0	3.11e-13
40	17451	F	40	1071867	0	3.11e-13
40	23495	P	40	744368	0	3.11e-13
40	50144	F	40	524385	0	3.11e-13
40	50579	P	40	282636	0	3.11e-13
40	64018	P	40	847503	0	3.11e-13
40	92003	P	40	119543	0	3.11e-13
40	97612	P	40	534090	0	3.11e-13
40	109388	F	40	305213	0	3.11e-13
40	175752	P	40	232209	0	3.11e-13
40	230658	P	40	340481	0	3.11e-13
40	232997	P	40	651381	0	3.11e-13
40	239317	F	40	744345	0	3.11e-13
40	253864	F	40	959854	0	3.11e-13
40	282873	P	40	628148	0	3.11e-13
40	300204	F	40	300237	0	3.11e-13
40	300204	F	40	309224	0	3.11e-13
40	393893	P	40	1142884	0	3.11e-13
40	428081	P	40	1097959	0	3.11e-13
40	488007	F	40	614301	0	3.11e-13
40	532063	P	40	533618	0	3.11e-13
49	7342	P	49	719185	-3	5.9e-13
49	39981	P	49	655615	-3	5.9e-13
49	54247	F	49	1099037	-3	5.9e-13
49	96329	F	49	277965	-3	5.9e-13
49	243085	F	49	651708	-3	5.9e-13
49	425826	P	49	1037740	-3	5.9e-13
49	426034	P	49	1037520	-3	5.9e-13
49	487220	P	49	815105	-3	5.9e-13
49	644269	F	49	921614	-3	5.9e-13
49	962538	P	49	1042438	-3	5.9e-13
43	90273	P	43	339641	-1	6.27e-13
43	90273	F	43	949349	-1	6.27e-13
43	90273	P	43	1057482	-1	6.27e-13
43	99982	F	43	1151197	-1	6.27e-13
43	210356	P	43	908144	-1	6.27e-13
43	231781	F	43	318366	-1	6.27e-13
43	339641	P	43	409099	-1	6.27e-13
43	339641	P	43	1027558	-1	6.27e-13
43	409099	F	43	949349	-1	6.27e-13
43	409099	P	43	1057482	-1	6.27e-13
43	449179	P	43	908144	-1	6.27e-13
43	578373	F	43	695897	-1	6.27e-13
43	949349	F	43	1027558	-1	6.27e-13
43	1027558	P	43	1057482	-1	6.27e-13
46	324899	P	46	665598	-2	7.07e-13
46	425528	P	46	589373	-2	7.07e-13
46	425528	P	46	1130528	-2	7.07e-13
39	35437	P	39	840047	0	1.24e-12
39	119656	F	39	458649	0	1.24e-12
39	160440	P	39	764751	0	1.24e-12
39	171745	F	39	230786	0	1.24e-12
39	176579	F	39	230342	0	1.24e-12
39	198438	F	39	266292	0	1.24e-12
39	211070	P	39	907425	0	1.24e-12
39	253844	P	39	1125247	0	1.24e-12
39	266235	F	39	266292	0	1.24e-12
39	449893	P	39	907425	0	1.24e-12
39	534094	F	39	700633	0	1.24e-12
39	626125	P	39	700603	0	1.24e-12
39	700633	F	39	961446	0	1.24e-12
39	885116	P	39	909499	0	1.24e-12
39	934010	F	39	949333	0	1.24e-12
39	949295	P	39	1125247	0	1.24e-12
48	39834	F	48	98184	-3	2.22e-12
48	203324	P	48	1040267	-3	2.22e-12
48	228163	F	48	885596	-3	2.22e-12
48	442147	P	48	1040267	-3	2.22e-12
48	460415	F	48	743972	-3	2.22e-12
48	471888	P	48	680401	-3	2.22e-12
48	516631	P	48	857292	-3	2.22e-12
48	620941	F	48	1062606	-3	2.22e-12
48	784176	P	48	1019781	-3	2.22e-12
48	807714	F	48	872683	-3	2.22e-12
48	913727	F	48	1018830	-3	2.22e-12
48	934092	P	48	1057576	-3	2.22e-12
42	216814	P	42	672829	-1	2.45e-12
42	232949	F	42	620940	-1	2.45e-12
42	386304	F	42	427384	-1	2.45e-12
42	437711	F	42	938464	-1	2.45e-12
42	856465	P	42	899430	-1	2.45e-12
45	212040	P	45	907097	-2	2.71e-12
45	450863	P	45	907097	-2	2.71e-12
45	515008	P	45	829093	-2	2.71e-12
45	560660	P	45	945701	-2	2.71e-12
38	8186	P	38	91600	0	4.98e-12
38	62355	F	38	681342	0	4.98e-12
38	64049	P	38	1049441	0	4.98e-12
38	90259	P	38	1097966	0	4.98e-12
38	108810	P	38	537236	0	4.98e-12
38	174233	P	38	230111	0	4.98e-12
38	191520	F	38	733748	0	4.98e-12
38	215113	P	38	232154	0	4.98e-12
38	230823	F	38	568611	0	4.98e-12
38	388927	P	38	650326	0	4.98e-12
38	388928	P	38	659394	0	4.98e-12
38	409085	P	38	1097966	0	4.98e-12
47	17491	P	47	1038269	-3	8.31e-12
47	98492	F	47	326353	-3	8.31e-12
47	311254	P	47	524385	-3	8.31e-12
47	471466	P	47	680906	-3	8.31e-12
47	861951	F	47	1005974	-3	8.31e-12
47	1133424	P	47	1133424	-3	8.31e-12
41	31957	P	41	938149	-1	9.56e-12
41	169844	P	41	388927	-1	9.56e-12
41	219687	F	41	277610	-1	9.56e-12
41	393950	F	41	934026	-1	9.56e-12
41	474623	F	41	1079287	-1	9.56e-12
41	494060	P	41	1099546	-1	9.56e-12
41	587460	P	41	776169	-1	9.56e-12
41	766193	P	41	924711	-1	9.56e-12
41	776169	P	41	1128615	-1	9.56e-12
41	934026	F	41	934082	-1	9.56e-12
44	29009	F	44	618186	-2	1.03e-11
44	160027	F	44	491325	-2	1.03e-11
44	167173	F	44	901521	-2	1.03e-11
44	327682	F	44	676644	-2	1.03e-11
44	409126	F	44	934053	-2	1.03e-11
44	436817	P	44	998993	-2	1.03e-11
44	867586	P	44	1042103	-2	1.03e-11
37	6811	F	37	6867	0	1.99e-11
37	109114	P	37	146902	0	1.99e-11
37	109316	P	37	323141	0	1.99e-11
37	113804	F	37	345329	0	1.99e-11
37	160412	P	37	764791	0	1.99e-11
37	203919	P	37	331094	0	1.99e-11
37	231429	P	37	866678	0	1.99e-11
37	256929	F	37	419200	0	1.99e-11
37	331094	P	37	442742	0	1.99e-11
37	650326	F	37	659395	0	1.99e-11
37	864414	F	37	866509	0	1.99e-11
37	960135	F	37	1084934	0	1.99e-11
46	90864	F	46	878474	-3	3.11e-11
46	98475	F	46	326336	-3	3.11e-11
46	210199	P	46	908760	-3	3.11e-11
46	393893	P	46	523280	-3	3.11e-11
46	435020	F	46	618421	-3	3.11e-11
46	449022	P	46	908760	-3	3.11e-11
46	524385	P	46	856738	-3	3.11e-11
46	666391	P	46	925225	-3	3.11e-11
46	913810	F	46	1018909	-3	3.11e-11
46	913819	F	46	1018918	-3	3.11e-11
40	38371	F	40	575775	-1	3.73e-11
40	54733	F	40	482435	-1	3.73e-11
40	168718	F	40	770500	-1	3.73e-11
40	482435	F	40	915914	-1	3.73e-11
40	518071	P	40	676592	-1	3.73e-11
40	567651	P	40	793861	-1	3.73e-11
40	766405	F	40	886810	-1	3.73e-11
40	862399	F	40	1006394	-1	3.73e-11
43	58085	F	43	58115	-2	3.95e-11
43	210588	P	43	907904	-2	3.95e-11
43	328128	F	43	685724	-2	3.95e-11
43	449411	P	43	907904	-2	3.95e-11
43	474585	F	43	1079219	-2	3.95e-11
43	475238	F	43	679364	-2	3.95e-11
43	475289	F	43	679430	-2	3.95e-11
43	962551	P	43	1042431	-2	3.95e-11
36	12134	P	36	655337	0	7.96e-11
36	90270	P	36	1057549	0	7.96e-11
36	90384	P	36	97581	0	7.96e-11
36	97612	P	36	700633	0	7.96e-11
36	110555	F	36	614276	0	7.96e-11
36	160594	P	36	764622	0	7.96e-11
36	230437	P	36	458030	0	7.96e-11
36	232779	F	36	1150773	0	7.96e-11
36	266248	P	36	1057601	0	7.96e-11
36	266278	F	36	277145	0	7.96e-11
36	339601	P	36	393993	0	7.96e-11
36	387426	P	36	812293	0	7.96e-11
36	393993	F	36	409146	0	7.96e-11
36	409096	P	36	1057549	0	7.96e-11
36	409146	P	36	494949	0	7.96e-11
36	409146	F	36	949396	0	7.96e-11
36	569856	F	36	819090	0	7.96e-11
36	1027555	P	36	1057549	0	7.96e-11
36	1077364	F	36	1077721	0	7.96e-11
45	36765	F	45	813050	-3	1.16e-10
45	38397	F	45	575801	-3	1.16e-10
45	235508	F	45	456181	-3	1.16e-10
45	396081	P	45	684863	-3	1.16e-10
45	417889	P	45	681245	-3	1.16e-10
45	458551	F	45	810355	-3	1.16e-10
45	569716	F	45	735003	-3	1.16e-10
45	776825	F	45	1098888	-3	1.16e-10
45	784163	P	45	1019797	-3	1.16e-10
45	925221	F	45	925285	-3	1.16e-10
39	160520	P	39	764688	-1	1.46e-10
39	169847	F	39	650326	-1	1.46e-10
39	210930	P	39	907566	-1	1.46e-10
39	237982	P	39	903237	-1	1.46e-10
39	326932	P	39	1047552	-1	1.46e-10
39	449753	P	39	907566	-1	1.46e-10
39	491499	P	39	764997	-1	1.46e-10
39	499819	P	39	998847	-1	1.46e-10
39	807643	F	39	872624	-1	1.46e-10
39	839143	P	39	872893	-1	1.46e-10
39	885724	P	39	909349	-1	1.46e-10
42	34312	F	42	886678	-2	1.51e-10
42	54211	F	42	1099000	-2	1.51e-10
42	73530	P	42	488293	-2	1.51e-10
42	159976	F	42	491283	-2	1.51e-10
42	329483	P	42	961477	-2	1.51e-10
42	424810	P	42	833209	-2	1.51e-10
42	566395	P	42	938174	-2	1.51e-10
42	643918	F	42	921351	-2	1.51e-10
42	867635	P	42	1042056	-2	1.51e-10
42	872393	P	42	1057518	-2	1.51e-10
35	2304	P	35	740421	0	3.18e-10
35	66806	F	35	683875	0	3.18e-10
35	90244	F	35	277146	0	3.18e-10
35	95069	P	35	113810	0	3.18e-10
35	194456	P	35	233309	0	3.18e-10
35	198490	F	35	266231	0	3.18e-10
35	232068	F	35	711904	0	3.18e-10
35	232068	F	35	1088928	0	3.18e-10
35	317394	F	35	482399	0	3.18e-10
35	339649	P	35	409099	0	3.18e-10
35	348788	P	35	1142917	0	3.18e-10
35	426048	P	35	1037520	0	3.18e-10
35	426089	P	35	1037480	0	3.18e-10
35	578155	F	35	695641	0	3.18e-10
35	819597	P	35	1097220	0	3.18e-10
44	62883	P	44	482002	-3	4.34e-10
44	90244	F	44	251797	-3	4.34e-10
44	90244	F	44	253836	-3	4.34e-10
44	90244	F	44	949287	-3	4.34e-10
44	191369	F	44	733589	-3	4.34e-10
44	198481	P	44	1057454	-3	4.34e-10
44	203755	F	44	1154908	-3	4.34e-10
44	242993	F	44	651058	-3	4.34e-10
44	266299	F	44	1027549	-3	4.34e-10
44	356174	F	44	695558	-3	4.34e-10
44	433326	F	44	1053660	-3	4.34e-10
44	442578	F	44	1154908	-3	4.34e-10
44	458577	F	44	810381	-3	4.34e-10
44	475826	F	44	680088	-3	4.34e-10
44	662325	F	44	910719	-3	4.34e-10
44	783136	P	44	951716	-3	4.34e-10
44	934073	P	44	1057599	-3	4.34e-10
38	6808	F	38	631785	-1	5.67e-10
38	120413	F	38	122204	-1	5.67e-10
38	169846	F	38	659394	-1	5.67e-10
38	198576	F	38	377703	-1	5.67e-10
38	379955	F	38	482313	-1	5.67e-10
38	458536	P	38	878239	-1	5.67e-10
38	471850	P	38	680457	-1	5.67e-10
38	475648	F	38	679881	-1	5.67e-10
38	537821	P	38	1146713	-1	5.67e-10
38	588482	F	38	590187	-1	5.67e-10
38	588482	F	38	1131342	-1	5.67e-10
38	590187	F	38	1129637	-1	5.67e-10
38	641932	P	38	703456	-1	5.67e-10
38	644027	F	38	921460	-1	5.67e-10
38	1129637	F	38	1131342	-1	5.67e-10
41	6833	F	41	631782	-2	5.74e-10
41	6861	F	41	631782	-2	5.74e-10
41	175407	F	41	297808	-2	5.74e-10
41	232950	F	41	1062606	-2	5.74e-10
41	459580	F	41	899733	-2	5.74e-10
41	471793	P	41	680527	-2	5.74e-10
41	475408	F	41	679584	-2	5.74e-10
41	601858	P	41	901514	-2	5.74e-10
41	862157	F	41	1006170	-2	5.74e-10
41	901923	F	41	943597	-2	5.74e-10
41	979200	P	41	1067112	-2	5.74e-10
34	6909	P	34	612567	0	1.27e-09
34	65381	P	34	317540	0	1.27e-09
34	109084	F	34	1083123	0	1.27e-09
34	194510	F	34	231087	0	1.27e-09
34	203542	P	34	427933	0	1.27e-09
34	230895	P	34	352875	0	1.27e-09
34	266180	P	34	1103726	0	1.27e-09
34	277164	P	34	899391	0	1.27e-09
34	292634	F	34	344194	0	1.27e-09
34	324853	F	34	490334	0	1.27e-09
34	325233	F	34	844343	0	1.27e-09
34	385942	P	34	475934	0	1.27e-09
34	419978	P	34	427343	0	1.27e-09
34	427933	P	34	442365	0	1.27e-09
34	431932	P	34	475907	0	1.27e-09
34	482208	F	34	528461	0	1.27e-09
34	494911	F	34	505272	0	1.27e-09
34	523249	F	34	899366	0	1.27e-09
34	541091	P	34	1000303	0	1.27e-09
34	579594	F	34	1060943	0	1.27e-09
34	710763	P	34	851792	0	1.27e-09
34	815745	P	34	1122113	0	1.27e-09
34	851792	P	34	1087787	0	1.27e-09
34	872353	F	34	930977	0	1.27e-09
34	873127	F	34	910853	0	1.27e-09
34	1032682	F	34	1038247	0	1.27e-09
43	7407	P	43	719134	-3	1.62e-09
43	19150	F	43	327028	-3	1.62e-09
43	198454	F	43	934026	-3	1.62e-09
43	209829	P	43	909205	-3	1.62e-09
43	210646	P	43	907848	-3	1.62e-09
43	448652	P	43	909205	-3	1.62e-09
43	449469	P	43	907848	-3	1.62e-09
43	475504	F	43	679694	-3	1.62e-09
43	600378	P	43	650326	-3	1.62e-09
43	694734	F	43	949349	-3	1.62e-09
43	694734	P	43	1057482	-3	1.62e-09
40	39990	P	40	655615	-2	2.18e-09
40	41838	P	40	254516	-2	2.18e-09
40	169846	P	40	600382	-2	2.18e-09
40	256977	F	40	419254	-2	2.18e-09
40	428074	P	40	1057558	-2	2.18e-09
40	471732	P	40	680600	-2	2.18e-09
40	494961	F	40	1097975	-2	2.18e-09
40	755174	F	40	958078	-2	2.18e-09
40	847503	F	40	925226	-2	2.18e-09
40	913735	F	40	1018838	-2	2.18e-09
37	6906	F	37	780431	-1	2.21e-09
37	73950	F	37	331101	-1	2.21e-09
37	203864	F	37	871497	-1	2.21e-09
37	305205	F	37	840680	-1	2.21e-09
37	436625	P	37	999217	-1	2.21e-09
37	436779	P	37	999045	-1	2.21e-09
37	442687	F	37	871497	-1	2.21e-09
37	538340	P	37	965731	-1	2.21e-09
33	14762	P	33	936768	0	5.1e-09
33	50121	P	33	1038284	0	5.1e-09
33	55718	F	33	230755	0	5.1e-09
33	90264	F	33	428081	0	5.1e-09
33	142515	P	33	887214	0	5.1e-09
33	198464	F	33	934036	0	5.1e-09
33	201680	P	33	844344	0	5.1e-09
33	231490	P	33	861239	0	5.1e-09
33	231600	F	33	858570	0	5.1e-09
33	232345	P	33	852813	0	5.1e-09
33	260556	F	33	942159	0	5.1e-09
33	317446	P	33	814471	0	5.1e-09
33	339641	P	33	694744	0	5.1e-09
33	339651	F	33	1057549	0	5.1e-09
33	347992	P	33	712287	0	5.1e-09
33	347992	P	33	1089311	0	5.1e-09
33	385956	P	33	1045890	0	5.1e-09
33	387261	F	33	609103	0	5.1e-09
33	409090	F	33	428081	0	5.1e-09
33	412412	P	33	817046	0	5.1e-09
33	412412	P	33	1071843	0	5.1e-09
33	428081	F	33	1027549	0	5.1e-09
33	440503	P	33	844344	0	5.1e-09
33	533272	P	33	719784	0	5.1e-09
33	694744	F	33	949359	0	5.1e-09
33	792504	P	33	1098891	0	5.1e-09
33	817046	P	33	1032720	0	5.1e-09
33	856774	F	33	1038284	0	5.1e-09
33	949349	P	33	1057549	0	5.1e-09
33	1027549	P	33	1097966	0	5.1e-09
33	1032720	P	33	1071843	0	5.1e-09
33	1057492	F	33	1057549	0	5.1e-09
42	21453	P	42	779802	-3	6.03e-09
42	143520	F	42	498860	-3	6.03e-09
42	342376	F	42	523285	-3	6.03e-09
42	377638	F	42	943164	-3	6.03e-09
42	417900	P	42	681237	-3	6.03e-09
42	525642	P	42	681636	-3	6.03e-09
42	700975	P	42	1154883	-3	6.03e-09
42	861963	F	42	1005986	-3	6.03e-09
39	55620	P	39	523845	-2	8.3e-09
39	61702	P	39	380132	-2	8.3e-09
39	251794	P	39	480905	-2	8.3e-09
39	523281	P	39	745459	-2	8.3e-09
39	524356	F	39	1071837	-2	8.3e-09
39	643723	F	39	921152	-2	8.3e-09
39	934066	F	39	1027542	-2	8.3e-09
39	1016287	F	39	1154361	-2	8.3e-09
36	175412	F	36	610536	-1	8.6e-09
36	198481	P	36	339621	-1	8.6e-09
36	198481	F	36	949376	-1	8.6e-09
36	230720	P	36	332710	-1	8.6e-09
36	251784	F	36	949274	-1	8.6e-09
36	319548	P	36	435985	-1	8.6e-09
36	471357	P	36	681071	-1	8.6e-09
36	480580	P	36	1001871	-1	8.6e-09
36	484245	P	36	1027528	-1	8.6e-09
36	526293	F	36	734535	-1	8.6e-09
36	644084	F	36	921525	-1	8.6e-09
36	772736	P	36	930601	-1	8.6e-09
32	50122	F	32	817047	0	2.04e-08
32	50122	F	32	1071844	0	2.04e-08
32	84850	F	32	842994	0	2.04e-08
32	89047	P	32	95073	0	2.04e-08
32	89048	F	32	345335	0	2.04e-08
32	235628	F	32	456279	0	2.04e-08
32	309185	F	32	612490	0	2.04e-08
32	311291	P	32	817047	0	2.04e-08
32	311291	F	32	1038284	0	2.04e-08
32	311291	P	32	1071844	0	2.04e-08
32	324909	P	32	665602	0	2.04e-08
32	327563	F	32	490839	0	2.04e-08
32	339661	P	32	934017	0	2.04e-08
32	345336	P	32	485422	0	2.04e-08
32	374239	F	32	878193	0	2.04e-08
32	412412	F	32	1038284	0	2.04e-08
32	467842	F	32	609190	0	2.04e-08
32	493773	P	32	1099793	0	2.04e-08
32	665103	P	32	709110	0	2.04e-08
32	665103	P	32	1086134	0	2.04e-08
32	709287	F	32	815023	0	2.04e-08
32	710100	P	32	851910	0	2.04e-08
32	711619	F	32	852224	0	2.04e-08
32	772595	P	32	1099872	0	2.04e-08
32	815023	F	32	1086311	0	2.04e-08
32	817047	P	32	856774	0	2.04e-08
32	851910	P	32	1087124	0	2.04e-08
32	852224	F	32	1088643	0	2.04e-08
32	856774	P	32	1071844	0	2.04e-08
32	934073	P	32	1057559	0	2.04e-08
32	1032720	F	32	1038284	0	2.04e-08
41	7354	P	41	719181	-3	2.24e-08
41	8188	F	41	326515	-3	2.24e-08
41	21615	P	41	779631	-3	2.24e-08
41	48984	P	41	945645	-3	2.24e-08
41	57336	F	41	202022	-3	2.24e-08
41	57336	F	41	440845	-3	2.24e-08
41	108182	F	41	1125106	-3	2.24e-08
41	137542	F	41	760863	-3	2.24e-08
41	138220	P	41	959352	-3	2.24e-08
41	193425	P	41	982865	-3	2.24e-08
41	198436	F	41	409081	-3	2.24e-08
41	251810	P	41	339603	-3	2.24e-08
41	251810	P	41	494951	-3	2.24e-08
41	251810	F	41	949389	-3	2.24e-08
41	266308	P	41	339643	-3	2.24e-08
41	266308	F	41	949349	-3	2.24e-08
41	266308	P	41	1057484	-3	2.24e-08
41	339677	F	41	480905	-3	2.24e-08
41	416476	F	41	607296	-3	2.24e-08
41	523286	F	41	1142884	-3	2.24e-08
41	545529	F	41	1135961	-3	2.24e-08
41	772658	P	41	1099857	-3	2.24e-08
41	913582	F	41	1018691	-3	2.24e-08
41	934026	P	41	1057593	-3	2.24e-08
41	1098082	F	41	1098914	-3	2.24e-08
38	90872	F	38	878482	-2	3.15e-08
38	94939	F	38	425198	-2	3.15e-08
38	160081	F	38	491382	-2	3.15e-08
38	193156	P	38	822514	-2	3.15e-08
38	397323	F	38	601299	-2	3.15e-08
35	298799	F	35	684736	-1	3.34e-08
35	393904	P	35	1142908	-1	3.34e-08
35	930619	F	35	1033666	-1	3.34e-08
35	961707	F	35	1040318	-1	3.34e-08
31	65795	R	31	65795	0	8.15e-08
31	89048	F	31	113810	0	8.15e-08
31	89049	P	31	485423	0	8.15e-08
31	90257	P	31	339613	0	8.15e-08
31	90257	P	31	494961	0	8.15e-08
31	90257	F	31	949389	0	8.15e-08
31	95073	P	31	345335	0	8.15e-08
31	154032	F	31	1044152	0	8.15e-08
31	156964	F	31	712616	0	8.15e-08
31	156964	F	31	1089640	0	8.15e-08
31	177514	P	31	232463	0	8.15e-08
31	179318	P	31	801434	0	8.15e-08
31	198438	F	31	198494	0	8.15e-08
31	198494	F	31	266292	0	8.15e-08
31	203834	P	31	525340	0	8.15e-08
31	229945	P	31	342305	0	8.15e-08
31	230073	F	31	353505	0	8.15e-08
31	233880	P	31	1048581	0	8.15e-08
31	251810	F	31	949333	0	8.15e-08
31	266235	F	31	959872	0	8.15e-08
31	266292	F	31	959872	0	8.15e-08
31	266318	P	31	339643	0	8.15e-08
31	266318	F	31	949359	0	8.15e-08
31	266318	P	31	1057484	0	8.15e-08
31	309154	P	31	949839	0	8.15e-08
31	326940	P	31	1047552	0	8.15e-08
31	332007	F	31	590131	0	8.15e-08
31	332007	F	31	1131286	0	8.15e-08
31	336543	P	31	723273	0	8.15e-08
31	339613	P	31	409083	0	8.15e-08
31	409083	F	31	949389	0	8.15e-08
31	409139	F	31	1027542	0	8.15e-08
31	416737	F	31	418877	0	8.15e-08
31	442657	P	31	525340	0	8.15e-08
31	480864	P	31	612483	0	8.15e-08
31	484216	P	31	534125	0	8.15e-08
31	494991	P	31	949459	0	8.15e-08
31	533691	F	31	533917	0	8.15e-08
31	666395	P	31	700612	0	8.15e-08
31	701023	P	31	1154844	0	8.15e-08
31	772614	F	31	777573	0	8.15e-08
31	777092	F	31	1021135	0	8.15e-08
31	867599	P	31	1042103	0	8.15e-08
31	934036	P	31	1057593	0	8.15e-08
31	949315	F	31	959854	0	8.15e-08
40	17451	P	40	1038253	-3	8.3e-08
40	39852	F	40	98202	-3	8.3e-08
40	48975	P	40	945655	-3	8.3e-08
40	74252	F	40	939202	-3	8.3e-08
40	154874	P	40	1040314	-3	8.3e-08
40	169019	F	40	926935	-3	8.3e-08
40	266188	P	40	1057549	-3	8.3e-08
40	339591	F	40	1057432	-3	8.3e-08
40	397599	F	40	601604	-3	8.3e-08
40	397670	F	40	601677	-3	8.3e-08
40	409152	P	40	1057432	-3	8.3e-08
40	524385	P	40	1032690	-3	8.3e-08
40	568273	P	40	1099267	-3	8.3e-08
40	569535	F	40	744681	-3	8.3e-08
40	600382	P	40	733491	-3	8.3e-08
40	642242	P	40	703144	-3	8.3e-08
40	642242	P	40	876129	-3	8.3e-08
40	642270	P	40	703116	-3	8.3e-08
40	642270	P	40	876101	-3	8.3e-08
40	1024496	P	40	1065406	-3	8.3e-08
37	91263	F	37	91302	-2	1.19e-07
37	102059	F	37	104963	-2	1.19e-07
37	146813	P	37	803446	-2	1.19e-07
37	198536	F	37	266335	-2	1.19e-07
37	203918	P	37	326515	-2	1.19e-07
37	251796	F	37	872398	-2	1.19e-07
37	326515	P	37	442741	-2	1.19e-07
37	471899	P	37	680401	-2	1.19e-07
37	480905	P	37	933996	-2	1.19e-07
37	480905	F	37	1057518	-2	1.19e-07
37	569658	F	37	734937	-2	1.19e-07
37	644281	F	37	921626	-2	1.19e-07
37	872398	F	37	933996	-2	1.19e-07
37	900685	F	37	910286	-2	1.19e-07
34	6903	P	34	872361	-1	1.3e-07
34	90283	F	34	694744	-1	1.3e-07
34	156825	P	34	810255	-1	1.3e-07
34	159984	F	34	491291	-1	1.3e-07
34	347991	F	34	424618	-1	1.3e-07
34	409109	F	34	694744	-1	1.3e-07
34	412655	P	34	1121141	-1	1.3e-07
34	520071	P	34	878030	-1	1.3e-07
34	694744	F	34	1027568	-1	1.3e-07
34	731356	P	34	806487	-1	1.3e-07
34	791783	P	34	1098896	-1	1.3e-07
34	810255	P	34	903595	-1	1.3e-07
39	35237	P	39	227778	-3	3.07e-07
39	90257	F	39	198438	-3	3.07e-07
39	90257	F	39	266235	-3	3.07e-07
39	116271	F	39	651907	-3	3.07e-07
39	161612	F	39	987319	-3	3.07e-07
39	198360	F	39	952157	-3	3.07e-07
39	203767	F	39	1154920	-3	3.07e-07
39	266235	F	39	409083	-3	3.07e-07
39	339592	P	39	694787	-3	3.07e-07
39	388927	F	39	600383	-3	3.07e-07
39	409083	F	39	934010	-3	3.07e-07
39	409152	F	39	694787	-3	3.07e-07
39	442590	F	39	1154920	-3	3.07e-07
39	458569	F	39	810373	-3	3.07e-07
39	523288	P	39	1053570	-3	3.07e-07
39	600384	P	39	659393	-3	3.07e-07
39	712494	P	39	961703	-3	3.07e-07
39	784213	P	39	1019753	-3	3.07e-07
39	961703	P	39	1089518	-3	3.07e-07
30	34380	F	30	886750	0	3.26e-07
30	70100	P	30	1118699	0	3.26e-07
30	73950	P	30	203919	0	3.26e-07
30	73950	P	30	442742	0	3.26e-07
30	95073	F	30	485424	0	3.26e-07
30	113811	P	30	485424	0	3.26e-07
30	156307	F	30	676478	0	3.26e-07
30	160125	F	30	491411	0	3.26e-07
30	168728	F	30	770510	0	3.26e-07
30	170655	P	30	1146794	0	3.26e-07
30	190044	F	30	906601	0	3.26e-07
30	203450	P	30	971753	0	3.26e-07
30	231921	F	30	746858	0	3.26e-07
30	232497	P	30	248405	0	3.26e-07
30	232665	F	30	905990	0	3.26e-07
30	257249	P	30	297679	0	3.26e-07
30	266188	P	30	1057611	0	3.26e-07
30	304830	F	30	618437	0	3.26e-07
30	342378	F	30	722089	0	3.26e-07
30	349275	F	30	965123	0	3.26e-07
30	369415	F	30	1072986	0	3.26e-07
30	379771	F	30	819826	0	3.26e-07
30	393902	P	30	722089	0	3.26e-07
30	397495	F	30	601472	0	3.26e-07
30	442273	P	30	971753	0	3.26e-07
30	592208	F	30	1133363	0	3.26e-07
30	626125	F	30	666396	0	3.26e-07
30	662339	F	30	910733	0	3.26e-07
30	722089	F	30	1142885	0	3.26e-07
30	791787	F	30	792502	0	3.26e-07
30	816694	P	30	1043378	0	3.26e-07
30	902176	F	30	902191	0	3.26e-07
30	925234	F	30	1053579	0	3.26e-07
36	23897	F	36	143500	-2	4.51e-07
36	57293	F	36	733296	-2	4.51e-07
36	66840	P	36	841961	-2	4.51e-07
36	80238	F	36	1114877	-2	4.51e-07
36	90300	F	36	934053	-2	4.51e-07
36	191179	P	36	578444	-2	4.51e-07
36	191377	F	36	733597	-2	4.51e-07
36	201943	F	36	790740	-2	4.51e-07
36	243098	F	36	651721	-2	4.51e-07
36	302045	F	36	950631	-2	4.51e-07
36	326515	F	36	331095	-2	4.51e-07
36	352864	F	36	868993	-2	4.51e-07
36	354272	P	36	913361	-2	4.51e-07
36	431926	P	36	475935	-2	4.51e-07
36	434999	F	36	618400	-2	4.51e-07
36	440766	F	36	790740	-2	4.51e-07
36	487349	F	36	1010619	-2	4.51e-07
36	578051	F	36	695520	-2	4.51e-07
36	601832	P	36	785347	-2	4.51e-07
36	776839	F	36	1098902	-2	4.51e-07
36	819644	P	36	1097184	-2	4.51e-07
36	934053	F	36	1027585	-2	4.51e-07
33	89315	P	33	792384	-1	5.04e-07
33	90283	F	33	266205	-1	5.04e-07
33	98281	F	33	326146	-1	5.04e-07
33	108837	F	33	163392	-1	5.04e-07
33	160038	F	33	491336	-1	5.04e-07
33	162670	F	33	1001611	-1	5.04e-07
33	210425	P	33	908085	-1	5.04e-07
33	231190	F	33	324848	-1	5.04e-07
33	231190	F	33	490329	-1	5.04e-07
33	243004	F	33	651069	-1	5.04e-07
33	266205	F	33	409109	-1	5.04e-07
33	266205	F	33	1027568	-1	5.04e-07
33	323869	P	33	426089	-1	5.04e-07
33	354226	P	33	913421	-1	5.04e-07
33	424619	P	33	712287	-1	5.04e-07
33	424619	P	33	1089311	-1	5.04e-07
33	449248	P	33	908085	-1	5.04e-07
33	523285	P	33	847511	-1	5.04e-07
33	523285	P	33	925298	-1	5.04e-07
33	647041	F	33	772547	-1	5.04e-07
33	700984	P	33	1154883	-1	5.04e-07
33	772547	F	33	866337	-1	5.04e-07
33	786950	F	33	1048062	-1	5.04e-07
38	90270	F	38	266192	-3	1.13e-06
38	126603	F	38	1069353	-3	1.13e-06
38	168940	F	38	926887	-3	1.13e-06
38	179154	P	38	801577	-3	1.13e-06
38	198451	F	38	934079	-3	1.13e-06
38	251794	F	38	277143	-3	1.13e-06
38	253833	F	38	277143	-3	1.13e-06
38	266192	F	38	409096	-3	1.13e-06
38	266192	F	38	1027555	-3	1.13e-06
38	266277	F	38	933995	-3	1.13e-06
38	266294	P	38	1097966	-3	1.13e-06
38	269531	P	38	454361	-3	1.13e-06
38	277143	F	38	949284	-3	1.13e-06
38	304456	F	38	1015371	-3	1.13e-06
38	325058	P	38	517005	-3	1.13e-06
38	397607	F	38	601612	-3	1.13e-06
38	460140	F	38	517005	-3	1.13e-06
38	487051	P	38	815282	-3	1.13e-06
38	525650	P	38	681632	-3	1.13e-06
38	568285	P	38	1099257	-3	1.13e-06
38	581012	P	38	992169	-3	1.13e-06
38	629282	F	38	810847	-3	1.13e-06
38	760368	P	38	918961	-3	1.13e-06
38	901975	F	38	943641	-3	1.13e-06
38	949335	P	38	1097966	-3	1.13e-06
38	1057501	F	38	1097966	-3	1.13e-06
35	7415	P	35	719134	-2	1.71e-06
35	36775	F	35	813060	-2	1.71e-06
35	69674	F	35	459021	-2	1.71e-06
35	106759	F	35	1076103	-2	1.71e-06
35	198490	P	35	1057454	-2	1.71e-06
35	242547	P	35	350731	-2	1.71e-06
35	336293	P	35	626562	-2	1.71e-06
35	379872	F	35	1046745	-2	1.71e-06
35	385942	F	35	532059	-2	1.71e-06
35	475512	F	35	679702	-2	1.71e-06
35	784227	P	35	1019743	-2	1.71e-06
32	6775	F	32	523286	-1	1.96e-06
32	35905	P	32	960108	-1	1.96e-06
32	49403	P	32	557512	-1	1.96e-06
32	64018	F	32	523286	-1	1.96e-06
32	137710	F	32	930930	-1	1.96e-06
32	154878	P	32	961707	-1	1.96e-06
32	200864	F	32	666710	-1	1.96e-06
32	211029	P	32	907467	-1	1.96e-06
32	231260	F	32	1081741	-1	1.96e-06
32	324999	P	32	517046	-1	1.96e-06
32	346853	F	32	870565	-1	1.96e-06
32	385943	F	32	431930	-1	1.96e-06
32	386317	F	32	427397	-1	1.96e-06
32	394045	P	32	523251	-1	1.96e-06
32	417361	P	32	859547	-1	1.96e-06
32	425904	P	32	1037679	-1	1.96e-06
32	433344	F	32	1053678	-1	1.96e-06
32	449852	P	32	907467	-1	1.96e-06
32	461737	F	32	730725	-1	1.96e-06
32	471802	P	32	680527	-1	1.96e-06
32	523251	P	32	565873	-1	1.96e-06
32	523251	P	32	949448	-1	1.96e-06
32	565847	F	32	872445	-1	1.96e-06
32	579643	F	32	1060991	-1	1.96e-06
32	588517	F	32	590225	-1	1.96e-06
32	588517	F	32	1131380	-1	1.96e-06
32	590225	F	32	1129672	-1	1.96e-06
32	612497	F	32	793419	-1	1.96e-06
32	644170	F	32	921594	-1	1.96e-06
32	712594	F	32	903712	-1	1.96e-06
32	903712	F	32	1089618	-1	1.96e-06
32	1129672	F	32	1131380	-1	1.96e-06
37	20424	P	37	1097688	-3	4.18e-06
37	69686	F	37	459033	-3	4.18e-06
37	90326	P	37	780417	-3	4.18e-06
37	198440	P	37	1097967	-3	4.18e-06
37	198507	P	37	780417	-3	4.18e-06
37	210763	P	37	907732	-3	4.18e-06
37	251796	F	37	266278	-3	4.18e-06
37	253835	F	37	266278	-3	4.18e-06
37	266237	P	37	1097967	-3	4.18e-06
37	266278	F	37	949286	-3	4.18e-06
37	266278	P	37	1057518	-3	4.18e-06
37	336388	P	37	626480	-3	4.18e-06
37	339677	P	37	872398	-3	4.18e-06
37	396112	P	37	684840	-3	4.18e-06
37	417911	P	37	681231	-3	4.18e-06
37	425754	P	37	1037824	-3	4.18e-06
37	449586	P	37	907732	-3	4.18e-06
37	467968	F	37	476046	-3	4.18e-06
37	780417	P	37	959885	-3	4.18e-06
37	780417	P	37	1027611	-3	4.18e-06
37	934012	P	37	1097967	-3	4.18e-06
37	1057559	F	37	1057611	-3	4.18e-06
34	66423	P	34	1005752	-2	6.43e-06
34	90255	F	34	872354	-2	6.43e-06
34	90355	F	34	266335	-2	6.43e-06
34	160282	P	34	764925	-2	6.43e-06
34	430733	P	34	1096919	-2	6.43e-06
34	470534	P	34	735354	-2	6.43e-06
34	475934	P	34	532059	-2	6.43e-06
34	524361	F	34	817045	-2	6.43e-06
34	766246	P	34	924677	-2	6.43e-06
31	20223	P	31	949711	-1	7.58e-06
31	26604	P	31	207237	-1	7.58e-06
31	26604	P	31	446060	-1	7.58e-06
31	29022	F	31	618199	-1	7.58e-06
31	35340	P	31	1040573	-1	7.58e-06
31	74130	F	31	939097	-1	7.58e-06
31	90283	F	31	266318	-1	7.58e-06
31	119465	F	31	953153	-1	7.58e-06
31	119984	F	31	784052	-1	7.58e-06
31	169391	P	31	973901	-1	7.58e-06
31	198338	F	31	534125	-1	7.58e-06
31	198384	F	31	266271	-1	7.58e-06
31	198464	F	31	393960	-1	7.58e-06
31	198464	F	31	934092	-1	7.58e-06
31	202613	P	31	652357	-1	7.58e-06
31	231821	F	31	1037130	-1	7.58e-06
31	251789	F	31	253828	-1	7.58e-06
31	266271	P	31	1125271	-1	7.58e-06
31	266318	F	31	409109	-1	7.58e-06
31	266318	F	31	1027568	-1	7.58e-06
31	266335	P	31	1057576	-1	7.58e-06
31	283832	F	31	839361	-1	7.58e-06
31	292857	F	31	839361	-1	7.58e-06
31	339613	F	31	1097975	-1	7.58e-06
31	372658	F	31	1001907	-1	7.58e-06
31	394019	F	31	952174	-1	7.58e-06
31	409165	P	31	1057428	-1	7.58e-06
31	426538	P	31	819863	-1	7.58e-06
31	430641	P	31	1097007	-1	7.58e-06
31	435111	F	31	823126	-1	7.58e-06
31	435198	F	31	618609	-1	7.58e-06
31	436830	P	31	998993	-1	7.58e-06
31	441436	P	31	652357	-1	7.58e-06
31	475714	F	31	679967	-1	7.58e-06
31	494928	P	31	952174	-1	7.58e-06
31	517363	F	31	517420	-1	7.58e-06
31	568789	F	31	916440	-1	7.58e-06
31	588383	P	31	690473	-1	7.58e-06
31	589459	F	31	1038141	-1	7.58e-06
31	636571	P	31	869786	-1	7.58e-06
31	643593	F	31	921020	-1	7.58e-06
31	663042	F	31	1024058	-1	7.58e-06
31	663075	F	31	1024091	-1	7.58e-06
31	690473	P	31	1129538	-1	7.58e-06
31	753869	P	31	1097932	-1	7.58e-06
31	772794	P	31	930561	-1	7.58e-06
31	780394	F	31	1057576	-1	7.58e-06
31	792510	F	31	1102666	-1	7.58e-06
31	806819	P	31	841245	-1	7.58e-06
31	871905	F	31	1037088	-1	7.58e-06
31	949389	P	31	1097975	-1	7.58e-06
31	949422	F	31	952174	-1	7.58e-06
31	979959	P	31	1152126	-1	7.58e-06
31	1016295	F	31	1154369	-1	7.58e-06
31	1038141	F	31	1130614	-1	7.58e-06
36	8189	F	36	931692	-3	1.53e-05
36	17487	P	36	311291	-3	1.53e-05
36	19876	F	36	809267	-3	1.53e-05
36	90252	F	36	198400	-3	1.53e-05
36	90252	P	36	1125250	-3	1.53e-05
36	90272	F	36	694733	-3	1.53e-05
36	91600	P	36	326515	-3	1.53e-05
36	94062	F	36	95770	-3	1.53e-05
36	139360	P	36	958132	-3	1.53e-05
36	146796	F	36	719927	-3	1.53e-05
36	160151	P	36	765067	-3	1.53e-05
36	161600	F	36	987307	-3	1.53e-05
36	198453	F	36	393949	-3	1.53e-05
36	235582	F	36	456240	-3	1.53e-05
36	258725	P	36	1052475	-3	1.53e-05
36	266248	F	36	934079	-3	1.53e-05
36	266305	P	36	1057549	-3	1.53e-05
36	277145	F	36	933996	-3	1.53e-05
36	277145	P	36	1057519	-3	1.53e-05
36	297798	F	36	610521	-3	1.53e-05
36	393949	P	36	1057599	-3	1.53e-05
36	409098	F	36	694733	-3	1.53e-05
36	412973	P	36	973823	-3	1.53e-05
36	474833	F	36	678847	-3	1.53e-05
36	475752	F	36	680005	-3	1.53e-05
36	482119	F	36	700237	-3	1.53e-05
36	656065	P	36	955843	-3	1.53e-05
36	666391	F	36	677261	-3	1.53e-05
36	694733	F	36	1027557	-3	1.53e-05
36	760158	P	36	919183	-3	1.53e-05
33	38414	F	33	575818	-2	2.42e-05
33	58991	F	33	279065	-2	2.42e-05
33	90255	F	33	930978	-2	2.42e-05
33	98506	F	33	326367	-2	2.42e-05
33	126006	P	33	304818	-2	2.42e-05
33	154645	P	33	871198	-2	2.42e-05
33	165016	F	33	208876	-2	2.42e-05
33	165016	F	33	447699	-2	2.42e-05
33	169084	F	33	927000	-2	2.42e-05
33	210656	P	33	907848	-2	2.42e-05
33	213028	F	33	948579	-2	2.42e-05
33	266335	F	33	934109	-2	2.42e-05
33	266335	F	33	1027640	-2	2.42e-05
33	449479	P	33	907848	-2	2.42e-05
33	451851	F	33	948579	-2	2.42e-05
33	459270	P	33	1005393	-2	2.42e-05
33	474545	F	33	1079133	-2	2.42e-05
33	475785	F	33	680048	-2	2.42e-05
33	487132	P	33	815186	-2	2.42e-05
33	491444	P	33	765063	-2	2.42e-05
33	620965	F	33	1062630	-2	2.42e-05
33	695947	P	33	778624	-2	2.42e-05
33	710413	P	33	1039070	-2	2.42e-05
33	807823	F	33	872798	-2	2.42e-05
33	1039070	P	33	1087437	-2	2.42e-05
33	1057558	F	33	1097966	-2	2.42e-05
33	1098090	F	33	1098922	-2	2.42e-05
30	6744	P	30	348764	-1	2.94e-05
30	6774	P	30	745464	-1	2.94e-05
30	42548	P	30	905575	-1	2.94e-05
30	50781	F	30	515808	-1	2.94e-05
30	56495	P	30	233102	-1	2.94e-05
30	58980	P	30	810749	-1	2.94e-05
30	63987	P	30	348764	-1	2.94e-05
30	64017	P	30	745464	-1	2.94e-05
30	65793	R	30	65794	-1	2.94e-05
30	74204	F	30	348763	-1	2.94e-05
30	85224	P	30	599658	-1	2.94e-05
30	108983	F	30	519701	-1	2.94e-05
30	109146	P	30	146878	-1	2.94e-05
30	113946	F	30	231282	-1	2.94e-05
30	169029	F	30	926945	-1	2.94e-05
30	198357	P	30	626086	-1	2.94e-05
30	198465	F	30	428049	-1	2.94e-05
30	200314	F	30	1009035	-1	2.94e-05
30	201531	P	30	709104	-1	2.94e-05
30	201531	P	30	1086128	-1	2.94e-05
30	211971	P	30	345960	-1	2.94e-05
30	216891	P	30	672756	-1	2.94e-05
30	230027	F	30	347994	-1	2.94e-05
30	230027	P	30	712288	-1	2.94e-05
30	230027	P	30	1089312	-1	2.94e-05
30	230147	F	30	705082	-1	2.94e-05
30	250156	F	30	868317	-1	2.94e-05
30	256987	F	30	419264	-1	2.94e-05
30	309156	F	30	694776	-1	2.94e-05
30	325386	F	30	709104	-1	2.94e-05
30	325386	F	30	1086128	-1	2.94e-05
30	327696	F	30	676658	-1	2.94e-05
30	332755	F	30	476789	-1	2.94e-05
30	339687	F	30	484254	-1	2.94e-05
30	342376	F	30	1142913	-1	2.94e-05
30	345960	P	30	450794	-1	2.94e-05
30	348763	P	30	677236	-1	2.94e-05
30	348763	F	30	925266	-1	2.94e-05
30	385005	F	30	475970	-1	2.94e-05
30	385945	P	30	475911	-1	2.94e-05
30	393279	F	30	857860	-1	2.94e-05
30	400867	F	30	880409	-1	2.94e-05
30	428049	F	30	934037	-1	2.94e-05
30	431928	F	30	482918	-1	2.94e-05
30	436676	P	30	999155	-1	2.94e-05
30	440354	P	30	709104	-1	2.94e-05
30	440354	P	30	1086128	-1	2.94e-05
30	475253	F	30	679379	-1	2.94e-05
30	475911	F	30	475935	-1	2.94e-05
30	476565	F	30	813318	-1	2.94e-05
30	483237	P	30	1077423	-1	2.94e-05
30	487212	P	30	815132	-1	2.94e-05
30	494149	P	30	1099502	-1	2.94e-05
30	523251	F	30	839362	-1	2.94e-05
30	565830	P	30	595972	-1	2.94e-05
30	567692	P	30	793819	-1	2.94e-05
30	588620	P	30	662988	-1	2.94e-05
30	593872	F	30	1134718	-1	2.94e-05
30	617981	F	30	632633	-1	2.94e-05
30	662988	P	30	1129775	-1	2.94e-05
30	663109	P	30	1024106	-1	2.94e-05
30	677267	P	30	1053580	-1	2.94e-05
30	701243	P	30	731360	-1	2.94e-05
30	711724	F	30	1031126	-1	2.94e-05
30	712354	P	30	905577	-1	2.94e-05
30	722087	F	30	1142913	-1	2.94e-05
30	733490	F	30	812291	-1	2.94e-05
30	772671	F	30	776828	-1	2.94e-05
30	776818	P	30	777623	-1	2.94e-05
30	839362	F	30	899368	-1	2.94e-05
30	905577	P	30	1089378	-1	2.94e-05
30	949452	F	30	952208	-1	2.94e-05
30	1031126	F	30	1088748	-1	2.94e-05
30	1142883	F	30	1142913	-1	2.94e-05
35	22026	F	35	938131	-3	5.63e-05
35	57780	F	35	776140	-3	5.63e-05
35	91600	P	35	931692	-3	5.63e-05
35	139354	F	35	920360	-3	5.63e-05
35	169048	F	35	926964	-3	5.63e-05
35	198490	P	35	339613	-3	5.63e-05
35	198490	F	35	949385	-3	5.63e-05
35	210153	P	35	908875	-3	5.63e-05
35	251815	F	35	872417	-3	5.63e-05
35	266268	F	35	952178	-3	5.63e-05
35	277174	F	35	872456	-3	5.63e-05
35	301739	F	35	950426	-3	5.63e-05
35	323865	F	35	707378	-3	5.63e-05
35	396121	P	35	684833	-3	5.63e-05
35	426010	P	35	1037558	-3	5.63e-05
35	448976	P	35	908875	-3	5.63e-05
35	458507	F	35	810311	-3	5.63e-05
35	471073	F	35	815119	-3	5.63e-05
35	487369	F	35	1010639	-3	5.63e-05
35	578338	F	35	695868	-3	5.63e-05
35	612566	F	35	872354	-3	5.63e-05
35	642169	P	35	703222	-3	5.63e-05
35	694790	F	35	872428	-3	5.63e-05
35	712494	P	35	1040318	-3	5.63e-05
35	867559	P	35	1042148	-3	5.63e-05
35	872428	P	35	1057434	-3	5.63e-05
35	885622	P	35	909449	-3	5.63e-05
35	920360	P	35	958139	-3	5.63e-05
35	1040318	P	35	1089518	-3	5.63e-05
32	7722	P	32	774701	-2	9.1e-05
32	8937	F	32	513070	-2	9.1e-05
32	34281	P	32	399522	-2	9.1e-05
32	45283	F	32	950078	-2	9.1e-05
32	64055	P	32	393924	-2	9.1e-05
32	64055	P	32	694708	-2	9.1e-05
32	66676	P	32	365847	-2	9.1e-05
32	90264	F	32	934073	-2	9.1e-05
32	96402	P	32	1037165	-2	9.1e-05
32	154878	F	32	712497	-2	9.1e-05
32	154878	F	32	1089521	-2	9.1e-05
32	191418	F	32	733647	-2	9.1e-05
32	201992	P	32	1028901	-2	9.1e-05
32	202021	F	32	733336	-2	9.1e-05
32	216534	P	32	816841	-2	9.1e-05
32	246498	P	32	1021878	-2	9.1e-05
32	266299	P	32	1057611	-2	9.1e-05
32	266335	F	32	959914	-2	9.1e-05
32	356993	F	32	436129	-2	9.1e-05
32	393924	F	32	1049441	-2	9.1e-05
32	394050	F	32	952209	-2	9.1e-05
32	409083	F	32	872356	-2	9.1e-05
32	409090	F	32	934073	-2	9.1e-05
32	426134	P	32	1037438	-2	9.1e-05
32	428081	F	32	934073	-2	9.1e-05
32	440815	P	32	1028901	-2	9.1e-05
32	440844	F	32	733336	-2	9.1e-05
32	488113	P	32	803225	-2	9.1e-05
32	524363	P	32	1038284	-2	9.1e-05
32	565878	F	32	952209	-2	9.1e-05
32	587767	P	32	862950	-2	9.1e-05
32	600389	P	32	650326	-2	9.1e-05
32	609730	P	32	643651	-2	9.1e-05
32	642278	P	32	703116	-2	9.1e-05
32	642278	P	32	876101	-2	9.1e-05
32	663715	P	32	1098844	-2	9.1e-05
32	694708	F	32	1049441	-2	9.1e-05
32	745461	F	32	847511	-2	9.1e-05
32	745461	F	32	925298	-2	9.1e-05
32	819812	P	32	1077425	-2	9.1e-05
32	839360	P	32	949450	-2	9.1e-05
32	844334	P	32	905582	-2	9.1e-05
32	861973	F	32	1005996	-2	9.1e-05
32	862950	P	32	1128922	-2	9.1e-05
32	867311	F	32	1040806	-2	9.1e-05
32	934073	P	32	1097967	-2	9.1e-05
32	1140480	F	32	1140501	-2	9.1e-05
34	19855	F	34	809246	-3	0.000206
34	42553	F	34	712361	-3	0.000206
34	42553	F	34	1089385	-3	0.000206
34	45089	F	34	890057	-3	0.000206
34	54980	F	34	351331	-3	0.000206
34	66840	F	34	267027	-3	0.000206
34	90262	F	34	393939	-3	0.000206
34	92633	P	34	982961	-3	0.000206
34	96329	P	34	373759	-3	0.000206
34	108570	F	34	422289	-3	0.000206
34	138634	P	34	958932	-3	0.000206
34	167173	P	34	601858	-3	0.000206
34	190118	F	34	940343	-3	0.000206
34	198405	P	34	339610	-3	0.000206
34	198405	P	34	494958	-3	0.000206
34	198405	F	34	949389	-3	0.000206
34	198443	F	34	694723	-3	0.000206
34	200864	P	34	793551	-3	0.000206
34	209306	P	34	879093	-3	0.000206
34	214379	P	34	677208	-3	0.000206
34	251817	F	34	393993	-3	0.000206
34	251817	F	34	409146	-3	0.000206
34	253849	P	34	339610	-3	0.000206
34	253849	P	34	494958	-3	0.000206
34	253849	F	34	949389	-3	0.000206
34	266240	F	34	694723	-3	0.000206
34	266250	F	34	393949	-3	0.000206
34	266459	F	34	840577	-3	0.000206
34	302942	P	34	531787	-3	0.000206
34	325000	P	34	460178	-3	0.000206
34	325161	P	34	905659	-3	0.000206
34	339610	P	34	949300	-3	0.000206
34	339610	F	34	1125247	-3	0.000206
34	339650	F	34	1097956	-3	0.000206
34	393939	F	34	409088	-3	0.000206
34	393939	P	34	1097967	-3	0.000206
34	428087	P	34	1057551	-3	0.000206
34	448129	P	34	879093	-3	0.000206
34	453202	P	34	677208	-3	0.000206
34	471603	P	34	680751	-3	0.000206
34	483236	F	34	819815	-3	0.000206
34	494958	P	34	949300	-3	0.000206
34	494958	F	34	1125247	-3	0.000206
34	604679	F	34	665332	-3	0.000206
34	656134	P	34	1048452	-3	0.000206
34	694733	P	34	1057549	-3	0.000206
34	745464	P	34	1142909	-3	0.000206
34	759999	P	34	919348	-3	0.000206
34	780436	P	34	930977	-3	0.000206
34	949276	P	34	1057531	-3	0.000206
34	949300	F	34	949389	-3	0.000206
34	949349	P	34	1097956	-3	0.000206
34	949389	P	34	1125247	-3	0.000206
34	1057491	F	34	1097956	-3	0.000206
31	2353	P	31	740390	-2	0.000341
31	38375	F	31	292770	-2	0.000341
31	38383	F	31	1046081	-2	0.000341
31	47034	F	31	202019	-2	0.000341
31	47034	F	31	440842	-2	0.000341
31	48998	P	31	945641	-2	0.000341
31	65791	F	31	65795	-2	0.000341
31	73647	F	31	572599	-2	0.000341
31	90355	P	31	1057576	-2	0.000341
31	91265	F	31	996407	-2	0.000341
31	91304	F	31	996407	-2	0.000341
31	98256	F	31	326120	-2	0.000341
31	109386	F	31	840686	-2	0.000341
31	127813	P	31	757986	-2	0.000341
31	137552	F	31	760873	-2	0.000341
31	145075	P	31	598745	-2	0.000341
31	191577	F	31	733799	-2	0.000341
31	194922	P	31	713231	-2	0.000341
31	194922	P	31	1090255	-2	0.000341
31	198349	P	31	677257	-2	0.000341
31	198349	F	31	925244	-2	0.000341
31	198430	P	31	494969	-2	0.000341
31	198438	P	31	1057454	-2	0.000341
31	198536	P	31	1057576	-2	0.000341
31	230175	P	31	904038	-2	0.000341
31	266292	P	31	1057454	-2	0.000341
31	266335	F	31	393977	-2	0.000341
31	266335	F	31	428065	-2	0.000341
31	266335	P	31	780394	-2	0.000341
31	283833	F	31	523251	-2	0.000341
31	283833	F	31	899368	-2	0.000341
31	292858	F	31	523251	-2	0.000341
31	292858	F	31	899368	-2	0.000341
31	304905	F	31	823126	-2	0.000341
31	339610	P	31	959842	-2	0.000341
31	339613	P	31	872356	-2	0.000341
31	339613	P	31	930980	-2	0.000341
31	341262	P	31	776116	-2	0.000341
31	385946	P	31	533627	-2	0.000341
31	385957	P	31	426539	-2	0.000341
31	388939	P	31	733487	-2	0.000341
31	393986	P	31	1057567	-2	0.000341
31	394047	P	31	839361	-2	0.000341
31	409075	F	31	959864	-2	0.000341
31	409083	F	31	930980	-2	0.000341
31	409165	F	31	694800	-2	0.000341
31	423049	F	31	672025	-2	0.000341
31	426349	P	31	1037214	-2	0.000341
31	426539	F	31	1045891	-2	0.000341
31	458427	P	31	1081975	-2	0.000341
31	494516	P	31	867317	-2	0.000341
31	494958	P	31	959842	-2	0.000341
31	494961	P	31	872356	-2	0.000341
31	494961	P	31	930980	-2	0.000341
31	494969	P	31	959864	-2	0.000341
31	510928	P	31	1030031	-2	0.000341
31	565875	P	31	839361	-2	0.000341
31	610080	P	31	979833	-2	0.000341
31	610090	P	31	979823	-2	0.000341
31	622661	F	31	861783	-2	0.000341
31	662148	F	31	662166	-2	0.000341
31	677266	P	31	847512	-2	0.000341
31	677266	P	31	925299	-2	0.000341
31	694774	P	31	949839	-2	0.000341
31	712502	P	31	961703	-2	0.000341
31	780431	P	31	872361	-2	0.000341
31	790104	F	31	1098933	-2	0.000341
31	792506	F	31	1099854	-2	0.000341
31	835069	P	31	1009769	-2	0.000341
31	871553	P	31	910275	-2	0.000341
31	872356	F	31	949389	-2	0.000341
31	872359	F	31	959842	-2	0.000341
31	930980	F	31	949389	-2	0.000341
31	949392	F	31	959842	-2	0.000341
31	959872	P	31	1057454	-2	0.000341
31	959914	P	31	1057576	-2	0.000341
31	1027640	P	31	1057576	-2	0.000341
31	1047926	P	31	1082005	-2	0.000341
31	1098891	P	31	1099854	-2	0.000341
33	18394	P	33	373284	-3	0.000751
33	73694	F	33	572645	-3	0.000751
33	90326	P	33	949824	-3	0.000751
33	126006	P	33	618425	-3	0.000751
33	142751	F	33	377830	-3	0.000751
33	198507	P	33	949824	-3	0.000751
33	266251	F	33	934026	-3	0.000751
33	266299	F	33	428081	-3	0.000751
33	269531	P	33	672386	-3	0.000751
33	339660	P	33	428081	-3	0.000751
33	339660	F	33	1097966	-3	0.000751
33	428081	F	33	949340	-3	0.000751
33	428081	P	33	1057501	-3	0.000751
33	458888	F	33	1078013	-3	0.000751
33	494961	P	33	949331	-3	0.000751
33	513932	P	33	1035361	-3	0.000751
33	523273	P	33	694697	-3	0.000751
33	540530	P	33	903761	-3	0.000751
33	571264	P	33	571264	-3	0.000751
33	612566	F	33	930978	-3	0.000751
33	640564	P	33	900485	-3	0.000751
33	642711	F	33	866747	-3	0.000751
33	643875	F	33	921305	-3	0.000751
33	659843	F	33	1060354	-3	0.000751
33	760197	P	33	919147	-3	0.000751
33	810311	P	33	878273	-3	0.000751
33	949824	P	33	959885	-3	0.000751
33	949824	P	33	1027611	-3	0.000751
33	1052704	P	33	1059229	-3	0.000751
33	1052714	P	33	1059219	-3	0.000751
33	1099477	F	33	1099498	-3	0.000751
30	2895	F	30	239062	-2	0.00128
30	6777	P	30	1053579	-2	0.00128
30	14695	P	30	936837	-2	0.00128
30	27146	F	30	498645	-2	0.00128
30	34325	F	30	886691	-2	0.00128
30	56541	P	30	232272	-2	0.00128
30	59694	F	30	630757	-2	0.00128
30	59835	F	30	230979	-2	0.00128
30	64020	P	30	1053579	-2	0.00128
30	73950	F	30	326521	-2	0.00128
30	90881	F	30	878491	-2	0.00128
30	119635	F	30	567177	-2	0.00128
30	142857	F	30	377928	-2	0.00128
30	156948	P	30	1005691	-2	0.00128
30	168121	F	30	930959	-2	0.00128
30	169857	P	30	169857	-2	0.00128
30	181756	P	30	232637	-2	0.00128
30	198056	P	30	863897	-2	0.00128
30	198447	F	30	266188	-2	0.00128
30	202012	P	30	974446	-2	0.00128
30	203915	P	30	332003	-2	0.00128
30	228181	F	30	885614	-2	0.00128
30	230027	F	30	424621	-2	0.00128
30	231463	F	30	621082	-2	0.00128
30	232927	F	30	324245	-2	0.00128
30	253874	F	30	409075	-2	0.00128
30	253874	P	30	494970	-2	0.00128
30	266188	F	30	266244	-2	0.00128
30	293442	P	30	431193	-2	0.00128
30	309159	P	30	1057450	-2	0.00128
30	327866	F	30	399853	-2	0.00128
30	332005	P	30	442736	-2	0.00128
30	356142	F	30	578046	-2	0.00128
30	371897	F	30	852016	-2	0.00128
30	377650	F	30	943176	-2	0.00128
30	379803	F	30	483242	-2	0.00128
30	387434	P	30	733490	-2	0.00128
30	397552	F	30	601543	-2	0.00128
30	430772	P	30	1096889	-2	0.00128
30	435036	F	30	618437	-2	0.00128
30	435168	F	30	618574	-2	0.00128
30	437682	F	30	938427	-2	0.00128
30	440835	P	30	974446	-2	0.00128
30	460773	F	30	476060	-2	0.00128
30	467874	P	30	777571	-2	0.00128
30	467875	F	30	609152	-2	0.00128
30	471053	F	30	815099	-2	0.00128
30	474118	F	30	808927	-2	0.00128
30	475567	F	30	679778	-2	0.00128
30	475934	F	30	533628	-2	0.00128
30	480917	P	30	612549	-2	0.00128
30	482917	F	30	532057	-2	0.00128
30	484208	F	30	677260	-2	0.00128
30	484208	P	30	925242	-2	0.00128
30	493913	P	30	1099678	-2	0.00128
30	505283	P	30	565854	-2	0.00128
30	523252	P	30	1125218	-2	0.00128
30	526112	F	30	871524	-2	0.00128
30	534135	F	30	961495	-2	0.00128
30	537833	P	30	1146709	-2	0.00128
30	568797	F	30	916448	-2	0.00128
30	575341	R	30	575341	-2	0.00128
30	612539	F	30	872472	-2	0.00128
30	634034	P	30	1108114	-2	0.00128
30	643517	F	30	920912	-2	0.00128
30	656170	P	30	1048420	-2	0.00128
30	689375	P	30	1010858	-2	0.00128
30	720883	P	30	828720	-2	0.00128
30	750097	F	30	750491	-2	0.00128
30	755187	F	30	958091	-2	0.00128
30	776828	P	30	792507	-2	0.00128
30	803464	P	30	1068703	-2	0.00128
30	847511	F	30	1053579	-2	0.00128
30	872358	P	30	1097974	-2	0.00128
30	899369	P	30	1125218	-2	0.00128
30	925298	F	30	1053579	-2	0.00128
30	930983	F	30	959842	-2	0.00128
30	962565	P	30	1042430	-2	0.00128
30	979214	P	30	1067109	-2	0.00128
30	1069601	F	30	1069618	-2	0.00128
30	1099858	F	30	1102666	-2	0.00128
32	6910	P	32	934066	-3	0.00273
32	6911	P	32	930979	-3	0.00273
32	17491	F	32	50122	-3	0.00273
32	17491	P	32	412412	-3	0.00273
32	17491	P	32	856774	-3	0.00273
32	17491	P	32	1032720	-3	0.00273
32	19543	P	32	575165	-3	0.00273
32	25735	P	32	208086	-3	0.00273
32	25735	P	32	446909	-3	0.00273
32	57477	F	32	809476	-3	0.00273
32	59939	F	32	232879	-3	0.00273
32	68076	F	32	944128	-3	0.00273
32	101922	F	32	212240	-3	0.00273
32	101922	F	32	451063	-3	0.00273
32	101922	P	32	906906	-3	0.00273
32	126789	F	32	1069480	-3	0.00273
32	139369	P	32	958127	-3	0.00273
32	146802	F	32	1068703	-3	0.00273
32	154653	P	32	871191	-3	0.00273
32	169338	P	32	246518	-3	0.00273
32	198445	F	32	428081	-3	0.00273
32	198445	F	32	1027549	-3	0.00273
32	210693	P	32	907816	-3	0.00273
32	235591	F	32	456249	-3	0.00273
32	236486	F	32	591441	-3	0.00273
32	236486	F	32	1132596	-3	0.00273
32	242556	P	32	350725	-3	0.00273
32	251808	P	32	631749	-3	0.00273
32	253827	F	32	612546	-3	0.00273
32	266242	F	32	428081	-3	0.00273
32	266242	F	32	1027549	-3	0.00273
32	277974	P	32	373752	-3	0.00273
32	277974	F	32	521701	-3	0.00273
32	283832	P	32	394046	-3	0.00273
32	283832	P	32	565874	-3	0.00273
32	283832	P	32	949449	-3	0.00273
32	292857	P	32	394046	-3	0.00273
32	292857	P	32	565874	-3	0.00273
32	292857	P	32	949449	-3	0.00273
32	323628	F	32	336847	-3	0.00273
32	327726	F	32	1060518	-3	0.00273
32	393941	F	32	428081	-3	0.00273
32	393941	F	32	1027549	-3	0.00273
32	393941	P	32	1057559	-3	0.00273
32	426091	P	32	707381	-3	0.00273
32	428081	F	32	934017	-3	0.00273
32	431930	F	32	532060	-3	0.00273
32	449516	P	32	907816	-3	0.00273
32	455214	F	32	673472	-3	0.00273
32	458964	P	32	582333	-3	0.00273
32	459607	F	32	665422	-3	0.00273
32	467874	P	32	772610	-3	0.00273
32	480898	F	32	631749	-3	0.00273
32	494150	P	32	1099478	-3	0.00273
32	499345	P	32	565795	-3	0.00273
32	516680	P	32	857259	-3	0.00273
32	523286	P	32	925234	-3	0.00273
32	533368	P	32	719682	-3	0.00273
32	578960	F	32	1040040	-3	0.00273
32	598767	P	32	903759	-3	0.00273
32	609730	P	32	921080	-3	0.00273
32	612497	F	32	872459	-3	0.00273
32	612568	F	32	934066	-3	0.00273
32	631749	P	32	872410	-3	0.00273
32	631749	P	32	934008	-3	0.00273
32	631749	F	32	1057511	-3	0.00273
32	631756	P	32	949324	-3	0.00273
32	666710	P	32	793553	-3	0.00273
32	694725	P	32	1057611	-3	0.00273
32	707381	F	32	1037481	-3	0.00273
32	902137	F	32	1034879	-3	0.00273
32	913912	F	32	1019014	-3	0.00273
32	934017	F	32	1027549	-3	0.00273
32	1007270	F	32	1155657	-3	0.00273
32	1039080	P	32	1087428	-3	0.00273
32	1057609	F	32	1103720	-3	0.00273
32	1098861	F	32	1099885	-3	0.00273
31	6911	P	31	694774	-3	0.0099
31	8199	P	31	113805	-3	0.0099
31	8199	P	31	345330	-3	0.0099
31	9260	P	31	774161	-3	0.0099
31	23328	F	31	238832	-3	0.0099
31	25604	P	31	208218	-3	0.0099
31	25604	P	31	447041	-3	0.0099
31	28370	F	31	778332	-3	0.0099
31	41832	P	31	996034	-3	0.0099
31	50155	P	31	1060470	-3	0.0099
31	50158	P	31	1038250	-3	0.0099
31	62941	P	31	481954	-3	0.0099
31	67663	P	31	108215	-3	0.0099
31	82973	F	31	233690	-3	0.0099
31	85338	P	31	1051524	-3	0.0099
31	85896	F	31	746988	-3	0.0099
31	90257	F	31	198494	-3	0.0099
31	90257	F	31	959872	-3	0.0099
31	90313	F	31	1027542	-3	0.0099
31	103909	F	31	1123610	-3	0.0099
31	113809	P	31	590124	-3	0.0099
31	113809	P	31	1131279	-3	0.0099
31	143512	F	31	498852	-3	0.0099
31	143910	P	31	1136066	-3	0.0099
31	154625	P	31	697569	-3	0.0099
31	155228	F	31	387266	-3	0.0099
31	189333	P	31	232026	-3	0.0099
31	198405	F	31	409083	-3	0.0099
31	198438	P	31	339613	-3	0.0099
31	198438	F	31	949389	-3	0.0099
31	198494	F	31	409083	-3	0.0099
31	198494	P	31	494961	-3	0.0099
31	201951	F	31	790748	-3	0.0099
31	204228	P	31	871835	-3	0.0099
31	210376	P	31	908136	-3	0.0099
31	219541	F	31	277383	-3	0.0099
31	241990	P	31	1060967	-3	0.0099
31	251810	F	31	409083	-3	0.0099
31	251815	P	31	480892	-3	0.0099
31	253849	F	31	409083	-3	0.0099
31	254531	F	31	996034	-3	0.0099
31	258733	P	31	1052472	-3	0.0099
31	266235	P	31	494961	-3	0.0099
31	266292	P	31	339613	-3	0.0099
31	266292	P	31	494961	-3	0.0099
31	266292	F	31	949389	-3	0.0099
31	277141	P	31	480915	-3	0.0099
31	277166	F	31	565850	-3	0.0099
31	282170	P	31	421805	-3	0.0099
31	292770	F	31	575779	-3	0.0099
31	311261	F	31	1038255	-3	0.0099
31	324708	P	31	663343	-3	0.0099
31	339613	P	31	934010	-3	0.0099
31	339613	P	31	949333	-3	0.0099
31	339613	P	31	959872	-3	0.0099
31	339613	F	31	1057510	-3	0.0099
31	339669	P	31	409139	-3	0.0099
31	345334	P	31	590124	-3	0.0099
31	345334	P	31	1131279	-3	0.0099
31	348797	P	31	1142882	-3	0.0099
31	357107	F	31	1038492	-3	0.0099
31	368100	F	31	368163	-3	0.0099
31	384990	F	31	475948	-3	0.0099
31	385943	F	31	482920	-3	0.0099
31	397370	F	31	601357	-3	0.0099
31	409083	F	31	949300	-3	0.0099
31	409083	P	31	1125250	-3	0.0099
31	412380	F	31	1060470	-3	0.0099
31	425912	P	31	1037672	-3	0.0099
31	440774	F	31	790748	-3	0.0099
31	443051	P	31	871835	-3	0.0099
31	449199	P	31	908136	-3	0.0099
31	467870	F	31	482916	-3	0.0099
31	471748	P	31	680593	-3	0.0099
31	474118	P	31	1045950	-3	0.0099
31	475940	P	31	482916	-3	0.0099
31	484209	F	31	666391	-3	0.0099
31	493966	P	31	1099642	-3	0.0099
31	494961	P	31	934010	-3	0.0099
31	494961	F	31	1057510	-3	0.0099
31	518448	F	31	652195	-3	0.0099
31	523286	F	31	677266	-3	0.0099
31	532058	P	31	777572	-3	0.0099
31	565845	F	31	612538	-3	0.0099
31	574072	P	31	1124388	-3	0.0099
31	595914	F	31	1068945	-3	0.0099
31	612568	F	31	694774	-3	0.0099
31	618688	P	31	903715	-3	0.0099
31	621053	F	31	1062683	-3	0.0099
31	630803	P	31	971269	-3	0.0099
31	663350	F	31	772731	-3	0.0099
31	677265	P	31	700612	-3	0.0099
31	689670	F	31	712357	-3	0.0099
31	689670	P	31	905573	-3	0.0099
31	689670	F	31	1089381	-3	0.0099
31	694774	P	31	780436	-3	0.0099
31	700612	F	31	925236	-3	0.0099
31	711739	F	31	1031141	-3	0.0099
31	712322	P	31	905619	-3	0.0099
31	733336	F	31	832682	-3	0.0099
31	772671	P	31	792506	-3	0.0099
31	772671	F	31	1098891	-3	0.0099
[truncated: 231 more rows]
