# Supplementary material for: Genomic insights into the clonal reproductive Opuntia cochenillifera: mitochondrial and chloroplast genomes of the cochineal cactus for enhanced understanding of structural dynamics and evolutionary implications
Source: Front Plant Sci. 2024 Mar 7;15:1347945. doi: 10.3389/fpls.2024.1347945 (PMC10954886; doi:10.3389/fpls.2024.1347945)
Supplement: Supplementary Table 8 — Relative synonymous codon usage of each amino acid pair codon in the mitochondrial genome of O. cochenillifera. [file Table_8.xlsx]

## Sheet: Sheet1
Table S8 The putative RNA editing sites in the O. cochenillifera mitochondrial genome.
gene	Base position	Amino position	Codon change	Amino change	Left motifs	Edited site	Right motifs	Probability
atp1	1064	355	UCG->UUG	Ser->Leu	TACTGATGGACAAATCTGTT	C	GGAAACAGAGCTCTTTTATC	0.999
atp1	1178	393	CCA->CUA	Pro->Leu	GAAACAAGTCTGCGGTAGTC	C	AAAACTGGAATTGGCACAAT	1
atp1	1292	431	CCG->CUG	Pro->Leu	TGCAAGGCTTACAGAAGTAC	C	GAAACAACCACAATATGCAC	0.999
atp1	1415	472	CCA->CUA	Pro->Leu	TCAATATGAGAGAACCATTC	C	AAATAGTGTAAAACCAGAAT	0.96
atp1	1447	483	CUG->UUG	Leu->Leu	AACCAGAATTATTACAATCC	C	TGTTATCAAAGGATGGGTTA	0.914
atp4	40	14	CUA->UUA	Leu->Leu	AGATGCAGGCGTCAAAGATT	C	TATTTGCTGCTATTCTCTCT	0.93
atp4	59	20	UCU->UUU	Ser->Phe	TCTATTTGCTGCTATTCTCT	C	TATTTGTGCATTAAGTTCGA	0.993
atp4	89	30	UCA->UUA	Ser->Leu	ATTAAGTTCGAAGAAGATCT	C	AATCTATAATGAAGAAATTA	0.999
atp4	215	72	UCG->UUG	Ser->Leu	CCAGGCTATTCAGGAAGAAT	C	GCAGCAATTCCCCAATCCTA	0.998
atp4	227	76	CCC->CUC	Pro->Leu	GGAAGAATCGCAGCAATTCC	C	CAATCCTAACGAAGTAGTTC	0.999
atp4	248	83	CCU->CUU	Pro->Leu	CAATCCTAACGAAGTAGTTC	C	TCCGGAATCCAATGAACAAC	1
atp4	250	84	CCG->UUG	Pro->Leu	ATCCTAACGAAGTAGTTCCT	C	CGGAATCCAATGAACAACAA	0.903
atp4	251	84	CCG->UUG	Pro->Leu	TCCTAACGAAGTAGTTCCTC	C	GGAATCCAATGAACAACAAC	1
atp4	395	132	UCA->UUA	Ser->Leu	TCGAAACCTAAATGTTAAGT	C	AGCAACACTTCCAAATGCCA	0.998
atp4	407	136	CCA->CUA	Pro->Leu	TGTTAAGTCAGCAACACTTC	C	AAATGCCACTTCTTCCCGTC	0.993
atp4	416	139	ACU->AUU	Thr->Ile	AGCAACACTTCCAAATGCCA	C	TTCTTCCCGTCGAACCCGTC	0.915
atp6	68	23	UCA->UUA	Ser->Leu	TAAAAACGGAGGAGGAAACT	C	AGTACCAAATGTTTGGCAAT	0.999
atp6	214	72	CGU->UGU	Arg->Cys	CTTTTACTTTTTTGTTATTT	C	GTAATCTCCAGGGTATGATA	0.997
atp6	412	138	CCU->UCU	Pro->Ser	TAGTACTCCTTGAGCTAATC	C	CTCATTGTTTTCGCGCATTA	0.999
atp6	415	139	CAU->UAU	His->Tyr	TACTCCTTGAGCTAATCCCT	C	ATTGTTTTCGCGCATTAAGC	1
atp6	437	146	UCA->UUA	Ser->Leu	TTGTTTTCGCGCATTAAGCT	C	AGGAATACGTTTATTTGCTA	0.999
atp6	479	160	UCA->UUA	Ser->Leu	TATGATGGCCGGTCATAGTT	C	AGTAAAGATTTTAAGTGGGT	1
atp6	608	203	UCA->UUA	Ser->Leu	TGAATTAGGTGTAGCTATAT	C	ACAAGCTCATGTTTCTACGA	0.998
atp6	616	206	CAU->UAU	His->Tyr	GTGTAGCTATATCACAAGCT	C	ATGTTTCTACGATCTTAATC	0.994
atp6	623	208	UCU->UUU	Ser->Phe	TATATCACAAGCTCATGTTT	C	TACGATCTTAATCTGTATTT	0.996
atp6	659	220	ACA->AUA	Thr->Ile	TATTTACTTGAATGATGCTA	C	AAATCTCCATCAAAATGGTT	0.999
atp6	670	224	CAA->UAA	Gln->End	ATGATGCTACAAATCTCCAT	C	AAAATGGTTATTTATTTATA	0.996
atp8	47	16	UCA->UUA	Ser->Leu	TTTTACACAATTCTTCTGGT	C	ATGCCTCTTCTTCTTTACTT	0.998
atp8	54	18	CUC->CUU	Leu->Leu	CAATTCTTCTGGTCATGCCT	C	TTCTTCTTTACTTTCTATAT	0.982
atp9	20	7	UCA->UUA	Ser->Leu	TATGTTAGAAGGTGCAAAAT	C	AATGGGAGCCGGAGCTGCTA	1
atp9	50	17	UCA->UUA	Ser->Leu	CGGAGCTGCTACAATTGCTT	C	AGCGGGAGCTGCTGTCGGTA	1
atp9	81	27	GUC->GUU	Val->Val	GCTGTCGGTATTGGAAACGT	C	TTTAGTTCCTCGATCCATTC	0.984
atp9	90	30	UCC->UCU	Ser->Ser	ATTGGAAACGTCTTTAGTTC	C	TCGATCCATTCCGTGGCGCG	0.985
atp9	92	31	UCG->UUG	Ser->Leu	TGGAAACGTCTTTAGTTCCT	C	GATCCATTCCGTGGCGCGAA	0.998
atp9	96	32	AUC->AUU	Ile->Ile	AACGTCTTTAGTTCCTCGAT	C	CATTCCGTGGCGCGAAATCC	0.997
atp9	212	71	UCA->UUA	Ser->Leu	AATGATGGCCTTTTTGATTT	C	ATTCGTATTCCGATCATCAA	0.999
atp9	223	75	CGA->UGA	Arg->End	TTTTGATTTCATTCGTATTC	C	GATCATCAAAAGTAAAGTTC	0.989
ccmB	28	10	CAU->UAU	His->Tyr	GACTCTTTTTTGAACTATAT	C	ATAAACAGATCTTCTTCTCC	0.983
ccmB	71	24	CCA->CUA	Pro->Leu	ACCAATCACGAGTTTTTCTC	C	ATTCCTCTCGTATATTGTCG	0.998
ccmB	80	27	UCG->UUG	Ser->Leu	GAGTTTTTCTCCATTCCTCT	C	GTATATTGTCGTAACGCCCC	0.972
ccmB	128	43	UCA->UUA	Ser->Leu	AGGTTTTGAAAAAGACTTTT	C	ATGTCATTTCCATTTAGGTC	0.997
ccmB	148	50	CCG->UUG	Pro->Leu	CATGTCATTTCCATTTAGGT	C	CGATTCGGATCCCCCCGTTG	0.991
ccmB	149	50	CCG->UUG	Pro->Leu	ATGTCATTTCCATTTAGGTC	C	GATTCGGATCCCCCCGTTGT	0.998
ccmB	154	52	CGG->UGG	Arg->Trp	ATTTCCATTTAGGTCCGATT	C	GGATCCCCCCGTTGTTTCCC	0.979
ccmB	164	55	CCG->CUG	Pro->Leu	AGGTCCGATTCGGATCCCCC	C	GTTGTTTCCCTTTCCTCCCG	0.965
ccmB	172	58	CCC->UCC	Pro->Ser	TTCGGATCCCCCCGTTGTTT	C	CCTTTCCTCCCGCACCCTTT	0.997
ccmB	181	61	CCC->UCC	Pro->Ser	CCCCGTTGTTTCCCTTTCCT	C	CCGCACCCTTTCTTCGAAAT	0.977
ccmB	286	96	CGG->UGG	Arg->Trp	TTCTACAATTGGTGGGTCAC	C	GGGTTATTCAAATAAGTCGT	0.976
ccmB	304	102	CGU->UGU	Arg->Cys	ACCGGGTTATTCAAATAAGT	C	GTGTTTTCTGTAGTTTTCCC	0.996
ccmB	367	123	CGG->UGG	Arg->Trp	TCGGTCAATCCGGAATGGAT	C	GGTTAAACATTCTATTAGGG	0.951
ccmB	379	127	CUA->UUA	Leu->Leu	GAATGGATCGGTTAAACATT	C	TATTAGGGAGCCCGGTCTTG	0.938
ccmB	392	131	CCG->CUG	Pro->Leu	AAACATTCTATTAGGGAGCC	C	GGTCTTGACTCTTCTGTGTG	1
ccmB	424	142	CGU->UGU	Arg->Cys	TTCTGTGTGGTATTCATTCT	C	GTTTGGCTCTTGGAATCACA	0.998
ccmB	467	156	UCG->UUG	Ser->Leu	CAGCAGTGGTTGGAACAGCT	C	GCAAAATTTAACCACTTCAC	0.999
ccmB	485	162	UCA->UUA	Ser->Leu	CTCGCAAAATTTAACCACTT	C	ACCTACTTCATTGCCCTCAA	0.967
ccmB	494	165	UCA->UUA	Ser->Leu	TTTAACCACTTCACCTACTT	C	ATTGCCCTCAACCGTTTCTC	0.994
ccmB	503	168	UCA->UUA	Ser->Leu	TTCACCTACTTCATTGCCCT	C	AACCGTTTCTCGTACCTCTA	0.981
ccmB	512	171	UCU->UUU	Ser->Phe	TTCATTGCCCTCAACCGTTT	C	TCGTACCTCTATTGAAACAG	0.988
ccmB	514	172	CGU->UGU	Arg->Cys	CATTGCCCTCAACCGTTTCT	C	GTACCTCTATTGAAACAGAA	0.993
ccmB	551	184	UCA->UUA	Ser->Leu	AGAATGGTTTCATGTTCTTT	C	ATCGATTGGTTATTTTTCTT	0.998
ccmB	554	185	UCG->UUG	Ser->Leu	ATGGTTTCATGTTCTTTCAT	C	GATTGGTTATTTTTCTTCGT	0.966
ccmB	569	190	UCU->UUU	Ser->Phe	TTCATCGATTGGTTATTTTT	C	TTCGTTCGTATCTCTTTTTC	0.961
ccmB	572	191	UCG->UUG	Ser->Leu	ATCGATTGGTTATTTTTCTT	C	GTTCGTATCTCTTTTTCCAA	0.999
ccmB	596	199	UCG->UUG	Ser->Leu	CGTATCTCTTTTTCCAATTT	C	GGTCTCGATTAGTTCACAAG	0.995
ccmB	611	204	UCA->UUA	Ser->Leu	AATTTCGGTCTCGATTAGTT	C	ACAAGATTGAATGGCCAATT	0.993
ccmC	5	2	UCC->UUC	Ser->Phe	AGGACCAAATTATCACATGT	C	CGTTTTGTTATTACAACCTT	0.948
ccmC	103	35	CAU->UAU	His->Tyr	TCTTAACAGCGATGGCTATT	C	ATTGTTGTCTTTGGGTAGCA	0.998
ccmC	133	45	CUU->UUU	Leu->Phe	TTTGGGTAGCACCACTAGAT	C	TTCAACAAGGTGGAAATTCT	0.985
ccmC	184	62	CGG->UGG	Arg->Trp	ATGTACATGTTCCTGTGGCT	C	GGATGAGTATTCTTGTTTAT	0.998
ccmC	281	94	ACA->AUA	Thr->Ile	TCGCTCCTCCGGAACCGGTA	C	AGAAATGGGTGCTTTTTCTA	0.963
ccmC	299	100	UCU->UUU	Ser->Phe	TACAGAAATGGGTGCTTTTT	C	TACGTTGTTTACCTTAGTTA	0.993
ccmC	331	111	CGG->UGG	Arg->Trp	CCTTAGTTACTGGGGGGTTT	C	GGGGAAGACCCATGTGGGGC	0.996
ccmC	395	132	UCG->UUG	Ser->Leu	GTTAACTTCTGTATTCATCT	C	GTTCCTTATTTACCTGGGTG	0.998
ccmC	399	133	UUC->UUU	Phe->Phe	ACTTCTGTATTCATCTCGTT	C	CTTATTTACCTGGGTGCACT	0.993
ccmC	400	134	CUU->UUU	Leu->Phe	CTTCTGTATTCATCTCGTTC	C	TTATTTACCTGGGTGCACTG	0.999
ccmC	436	146	CCU->UCU	Pro->Ser	CACTGTGTTTTCAAAAGCTT	C	CTGTCGAACCGGCTCCTATT	0.998
ccmC	446	149	CCG->CUG	Pro->Leu	TCAAAAGCTTCCTGTCGAAC	C	GGCTCCTATTTCAATCCGTG	0.999
ccmC	451	151	CCU->UCU	Pro->Ser	AGCTTCCTGTCGAACCGGCT	C	CTATTTCAATCCGTGCTGGA	0.999
ccmC	458	153	UCA->UUA	Ser->Leu	TGTCGAACCGGCTCCTATTT	C	AATCCGTGCTGGACCGATCG	0.979
ccmC	463	155	CGU->UGU	Arg->Cys	AACCGGCTCCTATTTCAATC	C	GTGCTGGACCGATCGATATA	0.999
ccmC	467	156	GCU->GUU	Ala->Val	GGCTCCTATTTCAATCCGTG	C	TGGACCGATCGATATACCAA	0.992
ccmC	473	158	CCG->CUG	Pro->Leu	TATTTCAATCCGTGCTGGAC	C	GATCGATATACCAATAATCA	0.995
ccmC	497	166	UCU->UUU	Ser->Phe	CGATATACCAATAATCAAGT	C	TCCAGTCAACTGGTGGAATA	0.999
ccmC	499	167	CCA->UCA	Pro->Ser	ATATACCAATAATCAAGTCT	C	CAGTCAACTGGTGGAATACA	0.997
ccmC	521	174	UCG->UUG	Ser->Leu	AGTCAACTGGTGGAATACAT	C	GCATCAACCTGGGAGCATTA	0.999
ccmC	548	183	UCU->UUU	Ser->Phe	ACCTGGGAGCATTAGCCGAT	C	TGGTACATCAATACATGTTC	0.994
ccmC	568	190	CCU->UCU	Pro->Ser	CTGGTACATCAATACATGTT	C	CTATGCCCATTCCAATCTTG	0.999
ccmC	575	192	CCC->CUC	Pro->Leu	ATCAATACATGTTCCTATGC	C	CATTCCAATCTTGTCTAACT	0.998
ccmC	614	205	UCA->UUA	Ser->Leu	CTTTGCTAACTTCCTCTTCT	C	AACCCGTATCTTGTTTGTTC	0.998
ccmC	619	207	CGU->UGU	Arg->Cys	CTAACTTCCTCTTCTCAACC	C	GTATCTTGTTTGTTCTGGAA	0.98
ccmC	624	208	AUC->AUU	Ile->Ile	TTCCTCTTCTCAACCCGTAT	C	TTGTTTGTTCTGGAAACACG	0.988
ccmC	650	217	CCU->CUU	Pro->Leu	TGTTCTGGAAACACGTCTTC	C	TATTCCATCTTTTCTCGAAT	0.997
ccmC	656	219	CCA->CUA	Pro->Leu	GGAAACACGTCTTCCTATTC	C	ATCTTTTCTCGAATCTCCTT	0.995
ccmC	673	225	CCU->UCU	Pro->Ser	TTCCATCTTTTCTCGAATCT	C	CTTTAACGGAAGAAATAGAA	0.998
ccmFC	38	13	UCC->UUC	Ser->Phe	CTTTTTCTTTTTCATTACTT	C	CATGGTCGTGCCTTGTGGCA	0.999
ccmFC	50	17	CCU->CUU	Pro->Leu	CATTACTTCCATGGTCGTGC	C	TTGTGGCACGGCAGCACCCG	1
ccmFC	103	35	CCC->UCC	Pro->Ser	GGTTCGTCAGTAGAGATGTT	C	CCACAGGTGCCCCTTTTTCC	0.999
ccmFC	122	41	UCC->UUC	Ser->Phe	TCCCACAGGTGCCCCTTTTT	C	CAATGGTACTTTAATTCCTA	0.997
ccmFC	382	128	CGU->UGU	Arg->Cys	AATCTTTTTGCGGTGTGCTC	C	GTTTACTATTCTTTCGTACT	0.998
ccmFC	397	133	CGU->UGU	Arg->Cys	TGCTCCGTTTACTATTCTTT	C	GTACTTTCTTCTCTTTACCA	0.998
ccmFC	1130	377	CCA->CUA	Pro->Leu	AGTGGCTATACATACAAATC	C	ATTTACGGATCTATATGCTT	0.996
ccmFC	1151	384	UCG->UUG	Ser->Leu	ATTTACGGATCTATATGCTT	C	GATTGGAACTGGAAGTTCAA	0.999
ccmFC	1225	409	CGG->UGG	Arg->Trp	TGCCTTTTATTTTTTTTATT	C	GGATAGGATTTCTGTTGGCT	0.989
ccmFC	1259	420	UCG->UUG	Ser->Leu	GTTGGCTTCGTTGGGGGGCT	C	GCGTAGTTTGTTACGTCAGC	0.993
ccmFC	1306	436	CGA->UGA	Arg->End	GGGATAAATTGCGTTGGAAT	C	GAAAGAGTTACGTAAAGTTC	0.961
ccmFN	38	13	CCG->CUG	Pro->Leu	GTTTCATTATTCGTTATTTC	C	GGGTCTTTTCATTGCATTCA	0.971
ccmFN	98	33	CCC->CUC	Pro->Leu	ACCAGCGTTTGGTGCAGCAC	C	CGCATTTTGGTGTATTCTTC	0.999
ccmFN	151	51	CCU->UCU	Pro->Ser	GTCTTTTGTTCTGTCATATT	C	CTAATAACTTATCCAATTAC	0.999
ccmFN	256	86	CGG->UGG	Arg->Trp	GTAGTATTTTATTATGGTGT	C	GGATCCTTTCTTTTTATGGA	0.999
ccmFN	713	238	CCU->CUU	Pro->Leu	CATTGCTTTGTTTTTCTTTC	C	TTTCCTATCAGCGAGTTCCG	0.999
ccmFN	722	241	UCA->UUA	Ser->Leu	GTTTTTCTTTCCTTTCCTAT	C	AGCGAGTTCCGATCCTTTTG	0.985
ccmFN	760	254	CGU->UGU	Arg->Cys	TTGTTCGAAATTTCTTCGTT	C	GTACCGAACCGCTTGCAGAA	0.998
ccmFN	782	261	UCA->UUA	Ser->Leu	TACCGAACCGCTTGCAGAAT	C	AAATCCTGTTCCACAAGATC	0.981
ccmFN	794	265	CCA->CUA	Pro->Leu	TGCAGAATCAAATCCTGTTC	C	ACAAGATCCTATATCAGCTA	0.999
ccmFN	809	270	UCA->UUA	Ser->Leu	TGTTCCACAAGATCCTATAT	C	AGCTATACATCCTCCTTGCA	0.991
ccmFN	1276	426	CGG->UGG	Arg->Trp	GAATTTGGATCTTGACATGT	C	GGTGGTTTTTAACCGTAGGC	0.992
ccmFN	1304	435	CCA->CUA	Pro->Leu	TTTAACCGTAGGCATCTTGC	C	AGGAAGTTGGTGGGCTCATC	1
ccmFN	1321	441	CAU->UAU	His->Tyr	TGCCAGGAAGTTGGTGGGCT	C	ATCATGAATTAGGTCGGGGT	1
ccmFN	1336	446	CGG->UGG	Arg->Trp	GGGCTCATCATGAATTAGGT	C	GGGGTGGCTGGTGGTTTCGG	0.999
ccmFN	1354	452	CGG->UGG	Arg->Trp	GTCGGGGTGGCTGGTGGTTT	C	GGGATCCCGTAGAAAATGCT	0.999
ccmFN	1387	463	CGG->UGG	Arg->Trp	AAAATGCTTCTTTTATGCCT	C	GGGTATTAGCCACAGCTCGT	1
ccmFN	1405	469	CGU->UGU	Arg->Cys	CTCGGGTATTAGCCACAGCT	C	GTATTCATTCAGTAATTTTA	0.996
ccmFN	1497	499	UCC->UCU	Ser->Ser	TGTGTCTTAGGAACCTTTTC	C	ATACGGTCCGGATTGCTAGC	0.945
ccmFN	1519	507	CCC->UCC	Pro->Ser	TACGGTCCGGATTGCTAGCT	C	CCGTTCATAGTTTTGCTACA	0.999
cob	42	14	CCC->CCU	Pro->Pro	TTCTCTGTTCTTAAACAACC	C	ATATTTTCCACACTTAATCA	0.988
cob	286	96	CUC->UUC	Leu->Phe	CTAATGGGGCAAGTATGTTT	C	TCATTGTGGTTCACCTTCAT	0.999
cob	298	100	CAC->UAC	His->Tyr	GTATGTTTCTCATTGTGGTT	C	ACCTTCATATTTTTCGTGGT	0.999
cob	325	109	CAU->UAU	His->Tyr	ATATTTTTCGTGGTCTATAT	C	ATGCGAGTTATAGCAGTCCT	1
cob	358	120	CGG->UGG	Arg->Trp	GCAGTCCTAGGGAATTTGTT	C	GGTGTCTCGGAGTTGTAATC	1
cob	568	190	CAU->UAU	His->Tyr	ATCGTTTTTTTAGTCTTCAT	C	ATTTACTCCCTTTTATTTTA	0.997
cob	808	270	CCC->UCC	Pro->Ser	ATATACCTGCTAATCCGATG	C	CCACCCCGCCTCATATTGTG	1
cob	908	303	CCA->CUA	Pro->Leu	AGGTGTAGCCGCAATAGCAC	C	AGTTTTTATATGTCTGTTGG	0.998
cob	982	328	CAC->UAC	His->Tyr	GTTCAAGTTTTCGCCCGATT	C	ACCAAGGAATATTTTGGTTG	0.999
cob	1081	361	CCU->UCU	Pro->Ser	TTGTTACTATTGGACAAATT	C	CTTCTTTTGTTTTCTTCTTG	0.998
cox2	138	46	CUC->CUU	Leu->Leu	CATGATATCTTTTTCTTCCT	C	ATTCTGATTTTGGTTTTCGT	0.934
cox2	161	54	UCA->UUA	Ser->Leu	TCTGATTTTGGTTTTCGTAT	C	ATGGATCTTGGTTCGCGCTT	0.992
cox2	253	85	CGG->UGG	Arg->Trp	GAACTACTATCGAGATTATT	C	GGACCATATTTCCGTCTATC	0.964
cox2	379	127	CGG->UGG	Arg->Trp	CTATTGGACATCAATGGTAT	C	GGACTTATGAGTATTCGGAC	0.999
cox2	443	148	ACG->AUG	Thr->Met	ACTCACTTTTGACAGTTATA	C	GATTCCAGAAGATGATCCAG	0.999
cox2	461	154	CCA->CUA	Pro->Leu	TACGATTCCAGAAGATGATC	C	AGAATTGGGTCAATCACGTT	1
cox2	476	159	UCA->UUA	Ser->Leu	TGATCCAGAATTGGGTCAAT	C	ACGTTTATTAGAAGTGGACA	1
cox2	581	194	UCA->UUA	Ser->Leu	TAGTTGGGCTGTACCTTCCT	C	AGGTGTCAAATGTGATGCTG	1
cox2	623	208	ACC->AUC	Thr->Ile	ACCTGGTCGTTTAAATCAGA	C	CTCTATTTTGGTACAACGAG	0.951
cox2	742	248	CGG->UGG	Arg->Trp	CTAGGAAAGATTATGGTTCT	C	GGGTATCTAATCAATTAATC	0.997
cox3	311	104	UCU->UUU	Ser->Phe	TTTTGCTTTTTTTTGGGCTT	C	TTCTCATTCTTCTTTGGCAC	0.999
cox3	314	105	UCU->UUU	Ser->Phe	TGCTTTTTTTTGGGCTTCTT	C	TCATTCTTCTTTGGCACCTG	0.998
cox3	388	130	CGG->UGG	Arg->Trp	GGATTGGGGTTTTAGATCCT	C	GGGAAATCCCTTTTCTTAAT	0.999
matR	26	9	CCC->CUC	Pro->Leu	AGAGGCGATCAGAATGGTAC	C	CGAATCCATTTACGATCCCG	1
matR	32	11	UCC->UUC	Ser->Phe	GATCAGAATGGTACCCGAAT	C	CATTTACGATCCCGAGTTTC	0.908
matR	147	49	UUC->UUU	Phe->Phe	TCTCGCTGGTTTTTGGAATT	C	GACATCTTTCAGTGTTTTCA	0.977
matR	1679	560	UCC->UUC	Ser->Phe	CGGAGACATCGTAAATTGGT	C	CGCGGGCATCGCGATAAGTC	0.996
matR	1700	567	CCU->CUU	Pro->Leu	CGCGGGCATCGCGATAAGTC	C	TCTGTCCTACTACAGGTGCC	0.999
matR	1720	574	CGC->UGC	Arg->Cys	CTCTGTCCTACTACAGGTGC	C	GCGACAACCTTTACCAAGTC	1
matR	1734	578	UAC->UAU	Tyr->Tyr	AGGTGCCGCGACAACCTTTA	C	CAAGTCCGAACGATTGTCGA	0.996
matR	1826	609	CCA->CUA	Pro->Leu	CTCAGCGCGGAATATAATCC	C	AAAGTACTCCAAAGACTCAA	0.988
mttB	64	22	CGG->UGG	Arg->Trp	AAGTTCGAATCCGTTTCGTT	C	GGATATTGATCGGTCTTGGT	0.995
mttB	100	34	CGU->UGU	Arg->Cys	TTGGTTTGACATGGTTTACG	C	GTTATTGGTTCCCGGAAGAG	0.999
mttB	111	37	UUC->UUU	Phe->Phe	TGGTTTACGCGTTATTGGTT	C	CCGGAAGAGTTAATATTCCC	0.938
mttB	112	38	CCG->UCG	Pro->Ser	GGTTTACGCGTTATTGGTTC	C	CGGAAGAGTTAATATTCCCA	0.997
mttB	131	44	CCA->CUA	Pro->Leu	CCCGGAAGAGTTAATATTCC	C	ATTAGCTAAACCCTTTCTTA	0.987
mttB	178	60	CGU->UGU	Arg->Cys	CTTTGGACTCGTATTTTGTT	C	GTACACAATCAACGGAGGCC	0.998
mttB	188	63	UCA->UUA	Ser->Leu	GTATTTTGTTCGTACACAAT	C	AACGGAGGCCTTACCGACAT	1
mttB	202	68	CCG->UCG	Pro->Ser	CACAATCAACGGAGGCCTTA	C	CGACATATCTTGCAACGTCT	0.996
mttB	262	88	CAC->UAC	His->Tyr	TCGTCTTTCCTTTTCTAAGT	C	ACCAAATTTGGTCCTTTTTG	0.99
mttB	331	111	CAU->UAU	His->Tyr	CGAAATACAATCGATTTTTC	C	ATTTAAGTGGTTTTTGCTTC	0.98
mttB	373	125	CUU->UUU	Leu->Phe	TCTTGTTCCTGTTCTTAACT	C	TTTCCCGGGTAGTTCCCAAT	0.943
mttB	379	127	CGG->UGG	Arg->Trp	TCCTGTTCTTAACTCTTTCC	C	GGGTAGTTCCCAATGTTTGG	0.994
mttB	407	136	CCA->CUA	Pro->Leu	TCCCAATGTTTGGCACTTTC	C	ATACTTCGTGGGTGCAACAT	0.999
mttB	497	166	UCG->UUG	Ser->Leu	TATGTTAACTGTTCGTATTT	C	GTTCATTCCATCGGTATGCT	0.994
mttB	505	169	CCA->UCA	Pro->Ser	CTGTTCGTATTTCGTTCATT	C	CATCGGTATGCTCCCAGGTA	0.995
mttB	541	181	CGU->UGU	Arg->Cys	AGGTACCTGTAATTGTGATC	C	GTTTGCTAGAACCGAGGGGT	1
mttB	554	185	CCG->CUG	Pro->Leu	TGTGATCCGTTTGCTAGAAC	C	GAGGGGTCTTTCTGTGGAAA	0.996
mttB	616	206	CUC->UUC	Leu->Phe	TTTTGATGGTTTTTGCGCTT	C	TCACAGCTGCTCTTTCCACA	0.977
mttB	660	220	AUC->AUU	Ile->Ile	CCGGATATCTGGTGCCAAAT	C	GTCGCCCGTTTCCTTATTTC	0.997
mttB	667	223	CGU->UGU	Arg->Cys	TCTGGTGCCAAATCGTCGCC	C	GTTTCCTTATTTCTTCGATA	0.99
mttB	683	228	UCG->UUG	Ser->Leu	CGCCCGTTTCCTTATTTCTT	C	GATAATAGAGTTGGCTATCT	0.998
mttB	713	238	UCG->UUG	Ser->Leu	GTTGGCTATCTTTGTGGCAT	C	GATTGTACAAGTTCGTGAAG	0.999
nad1	167	56	UCG->UUG	Ser->Leu	ACAACCTCTAGCAGATGGTT	C	GAAATTGATTCTAAAAGAAC	1
nad1	215	72	UCC->UUC	Ser->Phe	ACCAAGTAGTGCTAATTTCT	C	CCTTTTTAGAATGGCTCCAG	1
nad1	265	89	CGG->UGG	Arg->Trp	TTATGCTAAGTCTGGTTGCT	C	GGGCCGTTGTACCTTTTGAT	0.999
nad1	307	103	CCG->UUG	Pro->Leu	ATGGTATGGTATTGTCAGAT	C	CGAACATAGGGCTACTTTAT	0.995
nad1	308	103	CCG->UUG	Pro->Leu	TGGTATGGTATTGTCAGATC	C	GAACATAGGGCTACTTTATT	1
nad1	436	146	CCU->UCU	Pro->Ser	GATCTGCAGCTCAAATGGTC	C	CTTATGAAGTATCTATTGGT	0.991
nad1	490	164	CCU->UCU	Pro->Ser	CTGTACTAATATGTGTAGGT	C	CTCGTAATTCGAGTGAGATT	0.999
nad1	493	165	CGU->UGU	Arg->Cys	TACTAATATGTGTAGGTCCT	C	GTAATTCGAGTGAGATTGTC	0.999
nad1	500	167	UCG->UUG	Ser->Leu	ATGTGTAGGTCCTCGTAATT	C	GAGTGAGATTGTCATGGCGC	1
nad1	536	179	UCC->UUU	Ser->Phe	GGCGCAAAAGCAGATATGGT	C	CGGTATTCCCTTGTTCCCTG	0.997
nad1	537	179	UCC->UUU	Ser->Phe	GCGCAAAAGCAGATATGGTC	C	GGTATTCCCTTGTTCCCTGT	0.993
nad1	674	225	UCU->UUU	Ser->Phe	AGAATATTCTTCAATGGGGT	C	TGCTCTTTTTTTTTTAGGAG	0.994
nad1	740	247	UCU->UUU	Ser->Phe	TGGTCTATGCACATTGCTTT	C	TCCAGGAGGTTGGCCGCCTA	0.998
nad1	743	248	CCA->CUA	Pro->Leu	TCTATGCACATTGCTTTCTC	C	AGGAGGTTGGCCGCCTATCC	0.997
nad1	755	252	CCG->CUG	Pro->Leu	GCTTTCTCCAGGAGGTTGGC	C	GCCTATCCTAGATCTTCCCA	0.993
nad1	779	260	UCC->UUC	Ser->Phe	TATCCTAGATCTTCCCATTT	C	CAAAAGGATCCCGGGCTCAA	0.984
nad1	823	275	CUC->UUC	Leu->Phe	GGTTTAGTATCAAGGTGATT	C	TCTTTCTCTTTCTATATATA	0.98
nad1	898	300	CGG->UGG	Arg->Trp	ATCAATTAATGGGACTTGGC	C	GGAAAGTGTTCTTGCCTCTA	0.999
nad1	928	310	CGG->UGG	Arg->Trp	TCTTGCCTCTATCATTAGCT	C	GGGTAGTCGCCGTTTCTGGT	0.997
nad2	26	9	UCC->UUC	Ser->Phe	CAATCTTTTTTTAGCGGTTT	C	CCCAGAGATCTTTATCATTA	0.996
nad2	223	75	CUU->UUU	Leu->Phe	CCCATTTATTCTGGAATAAT	C	TTTTTAAGAGGGACAATTTT	0.998
nad2	341	114	UCC->UUC	Ser->Phe	GAGGTTTGATGCTTTTGAAT	C	CATTGTATTAATTTCACTTT	0.999
nad2	356	119	UCA->UUA	Ser->Leu	TGAATCCATTGTATTAATTT	C	ACTTTCTACTCGCAGTATGC	0.995
nad2	367	123	CGC->UGC	Arg->Cys	TATTAATTTCACTTTCTACT	C	GCAGTATGCTCTTTATGATC	0.995
nad2	394	132	CAU->UAU	His->Tyr	TGCTCTTTATGATCTCGGCT	C	ATGATTTAATTGCCATGTAT	0.999
nad2	428	143	CCU->CUU	Pro->Leu	CATGTATTTAGCTATTGAGC	C	TCAAAGTTTATGTTTTTATG	0.999
nad2	497	166	UCG->UUG	Ser->Leu	ATTTTCTACGGAAGCCGGCT	C	GAAATATTTGATCTTAGGTG	1
nad2	677	226	UCC->UUC	Ser->Phe	TCTTTTTATCGCTGTAGGAT	C	CCTATTCAAGATCACTGCAG	0.997
nad2	788	263	UCU->UUU	Ser->Phe	TGCGCCTAAAATTTCTATTT	C	TGCTAATATTTTACGTGTTT	0.999
nad2	928	310	CAU->UAU	His->Tyr	AAGTAAAAAGACTTCTAGCT	C	ATAGTTCAATTGGACATGTA	0.995
nad2	958	320	CGU->UGU	Arg->Cys	TTGGACATGTAGGTTATATT	C	GTACTGGTTTCTCATGTGGA	1
nad2	962	321	ACU->AUU	Thr->Ile	ACATGTAGGTTATATTCGTA	C	TGGTTTCTCATGTGGAACCA	0.997
nad2	1028	343	UCA->UUA	Ser->Leu	TGGTCTCTTTATTTATGCAT	C	AATGACGATAGATGCATTCG	0.999
nad2	1058	353	UCA->UUA	Ser->Leu	AGATGCATTCGCTATAGTTT	C	AGCATTACGGCAAACCCGTG	0.988
nad2	1127	376	UCG->UUG	Ser->Leu	AGCCAAAACGAATCCTATTT	C	GGCTATTACCTTCTCTATTA	0.998
nad2	1246	416	CCA->UCA	Pro->Ser	GTGGGGCTTACTTCCTAGCC	C	CAGTGGGAGTAGTGACTAGC	0.995
nad2	1400	467	UCA->UUA	Ser->Leu	GACTTCCTCTTTCATTACTT	C	ATCCTTTCCATATCCTTCTC	0.983
nad2	1403	468	UCC->UUC	Ser->Phe	TTCCTCTTTCATTACTTCAT	C	CTTTCCATATCCTTCTCCCT	0.959
nad2	1408	470	CCA->UUA	Pro->Leu	CTTTCATTACTTCATCCTTT	C	CATATCCTTCTCCCTTGTTC	0.991
nad2	1409	470	CCA->UUA	Pro->Leu	TTTCATTACTTCATCCTTTC	C	ATATCCTTCTCCCTTGTTCT	0.991
nad3	39	13	AUC->AUU	Ile->Ile	ATTTGCATCTATTTAGTGAT	C	AGTCTGCTAGTTTCTTTGAT	0.93
nad3	61	21	CCA->UUA	Pro->Leu	GTCTGCTAGTTTCTTTGATC	C	CACTCGGTGTTCCTTTTCCA	0.976
nad3	62	21	CCA->UUA	Pro->Leu	TCTGCTAGTTTCTTTGATCC	C	ACTCGGTGTTCCTTTTCCAT	0.999
nad3	80	27	CCA->CUA	Pro->Leu	CCCACTCGGTGTTCCTTTTC	C	ATTTTCTTCTAATAGTTCGA	0.998
nad3	208	70	CUU->UUU	Leu->Phe	TTTCAATTTTATTTATTATC	C	TTGATCCGGAAGTAACCTTT	0.999
nad3	215	72	CCG->CUG	Pro->Leu	TTTATTTATTATCCTTGATC	C	GGAAGTAACCTTTTTCTTTC	0.998
nad3	247	83	CCU->UCU	Pro->Ser	TTTTCTTTCCTTGGGCAGTA	C	CTCTCAACAAGATTGATCCG	0.997
nad3	266	89	CCG->CUG	Pro->Leu	ACCTCTCAACAAGATTGATC	C	GTTTGGATCTTGGTCCATGA	1
nad3	275	92	UCU->UUU	Ser->Phe	CAAGATTGATCCGTTTGGAT	C	TTGGTCCATGATGGCCTTTT	0.998
nad3	349	117	CGG->UGG	Arg->Trp	GGAAAAGGGGTGCTTTGGAT	C	GGGAGTAAGAAGACGCGATA	0.984
nad4	29	10	UCU->UUU	Ser->Phe	ACATTTCTGTGAATGCTATT	C	TGATCTAAGTGGTCTTATTC	1
nad4	74	25	ACU->AUU	Thr->Ile	TCCCGTGCTAGGAAGCATTA	C	TCTTCTTTTCATTCCAAATT	0.994
nad4	107	36	UCG->UUG	Ser->Leu	TCCAAATTCAAGAATACGAT	C	GATACGATTGATTGGTCTGT	0.995
nad4	158	53	CCU->CUU	Pro->Leu	TATTACTTTTTTGTATTCTC	C	TGTTCTTCGGATACAATTTG	0.996
nad4	166	56	CGG->UGG	Arg->Trp	TTTTGTATTCTCCTGTTCTT	C	GGATACAATTTGATCCTTCT	0.991
nad4	197	66	UCU->UUU	Ser->Phe	TGATCCTTCTACGGCCAAAT	C	TCAATTTGTGGAAAGCCTTC	0.998
nad4	362	121	ACA->AUA	Thr->Ile	TTATGGGAAAGAGTATATTA	C	AGCATCTCTAATTCGTGAAT	0.999
nad4	368	123	UCU->UUU	Ser->Phe	GAAAGAGTATATTACAGCAT	C	TCTAATTCGTGAATTTCTAA	0.996
nad4	376	126	CGU->UGU	Arg->Cys	ATATTACAGCATCTCTAATT	C	GTGAATTTCTAATGATCGCC	0.995
nad4	433	145	CUU->UUU	Leu->Phe	ATCTTCTACTATTCTATGTT	C	TTTCCGAAAGCGTGCCAATC	1
nad4	437	146	UCC->UUC	Ser->Phe	TCTACTATTCTATGTTCTTT	C	CGAAAGCGTGCCAATCCCTA	0.997
nad4	449	150	CCA->CUA	Pro->Leu	TGTTCTTTCCGAAAGCGTGC	C	AATCCCTATGTTCATTATTA	0.997
nad4	856	286	CUA->UUA	Leu->Leu	TCACTCCTTTCATTTATACT	C	TAAGCGCGATTGCTATAATA	0.98
nad4	1006	336	CUA->UUA	Leu->Leu	AGGGAATTGGAGGTAGCATT	C	TACCGATGTTAAGTCATGGA	0.952
nad4	1010	337	CCG->CUG	Pro->Leu	AATTGGAGGTAGCATTCTAC	C	GATGTTAAGTCATGGACTGG	1
nad4	1355	452	CCA->CUA	Pro->Leu	CCTCCATAAATTCTCCGATC	C	AAATGGCAGAGAAGTTTTCA	0.997
nad4	1405	469	CGG->UGG	Arg->Trp	CCTTTCTTGTTGGAGTTGTT	C	GGATGGGTGTTCACCCCAAA	0.999
nad4	1417	473	CAC->UAC	His->Tyr	GAGTTGTTCGGATGGGTGTT	C	ACCCCAAAGTGTTCCCGGAC	0.999
nad4	1433	478	CCG->CUG	Pro->Leu	TGTTCACCCCAAAGTGTTCC	C	GGACCGCATGCATACATCCG	0.999
nad4	1438	480	CGC->UGC	Arg->Cys	ACCCCAAAGTGTTCCCGGAC	C	GCATGCATACATCCGTAAGT	0.991
nad4L	2	1	ACG->AUG	Thr->Met	ACCATTCTTCGTTCCCGAAA	C	GGATTCGATCAAATATTTTA	0.917
nad4L	47	16	UCA->UUA	Ser->Leu	TTCTATGATCATCTTTATTT	C	AGGTATTCGGGGAATTCTCC	0.996
nad4L	55	19	CGG->UGG	Arg->Trp	TCATCTTTATTTCAGGTATT	C	GGGGAATTCTCCTTAATAGA	0.987
nad4L	95	32	UCA->UUA	Ser->Leu	ACGAAATATTCTTATTATGT	C	AATGTCAATTGAATCAATGT	1
nad4L	110	37	UCA->UUA	Ser->Leu	TATGTCAATGTCAATTGAAT	C	AATGTTATTAGCTGTGAATT	1
nad4L	158	53	UCG->UUG	Ser->Leu	TTTGGTCTTTTCTGTTTCTT	C	GGATGATATGATGGGTCAAT	0.995
nad4L	197	66	CCA->CUA	Pro->Leu	ATTATTTGCTTTATTGGTTC	C	AACGGTGGCAGCTGCGGAAT	1
nad4L	281	94	UCU->UUU	Ser->Phe	GGGGACTATTGCTGTAGAAT	C	TATTAATAGCATTCAAGGTT	0.997
nad5	155	52	CCG->CUG	Pro->Leu	TGCTTTTTATGAAGTCGCAC	C	GGGAGCTAGTGCTTGCTATC	1
nad5	242	81	CCG->CUG	Pro->Leu	GGGCTTCTTGTTCGATAGCC	C	GACCGTAGTGATGTTAATTG	1
nad5	358	120	CUU->UUU	Leu->Phe	TTATGTGTTATTTATCCATT	C	TTACTTTTTTTATGCCAATG	0.994
nad5	374	125	CCA->CUA	Pro->Leu	CATTCTTACTTTTTTTATGC	C	AATGTTGGTGACTGGAGATA	0.997
nad5	398	133	UCU->UUU	Ser->Phe	GTTGGTGACTGGAGATAACT	C	TCTTCAATTATTCTTGGGAT	1
nad5	548	183	UCG->UUG	Ser->Leu	TGGATTAGCTCTTGGGATTT	C	GGGTCGTTTTACTCTCTTTC	0.996
nad5	553	185	CGU->UGU	Arg->Cys	TAGCTCTTGGGATTTCGGGT	C	GTTTTACTCTCTTTCAAACA	0.999
nad5	629	210	UCU->UUU	Ser->Phe	CCCGCTAAATTCTTGGATTT	C	TTGCAATATGAGATTGAATG	0.997
nad5	713	238	UCG->UUG	Ser->Leu	AAAATCTGCACAGATAGGAT	C	GCATACTTGGTCACCCGATG	0.998
nad5	725	242	UCA->UUA	Ser->Leu	GATAGGATCGCATACTTGGT	C	ACCCGATGCTATGGAGGGTC	1
nad5	835	279	CCA->UCA	Pro->Ser	GTTCCCCTTTATTTGAATAC	C	CACCTACGGCTTTAATTGTT	0.993
nad5	1550	517	ACC->AUC	Thr->Ile	GTTTGCTGCTCCAACCATTA	C	CAAACTAATACCTATTCTGT	0.998
nad5	1580	527	UCA->UUA	Ser->Leu	ACCTATTCTGTTTAGTACTT	C	AGGTGCTTCTGTTGCGTATA	0.997
nad5	1589	530	UCU->UUU	Ser->Phe	GTTTAGTACTTCAGGTGCTT	C	TGTTGCGTATAATGTAAATC	0.985
nad5	1610	537	CCC->CUC	Pro->Leu	TGTTGCGTATAATGTAAATC	C	CGTAGCGGATCAATTCCAAC	0.999
nad5	1895	632	UCA->UUA	Ser->Leu	CTTTGCAATGTTACTTGGTT	C	AACTCTATTTGTGACCTTTT	0.998
nad5	1916	639	UCU->UUU	Ser->Phe	AACTCTATTTGTGACCTTTT	C	TCGTATGTGGGACTTTCTAT	0.999
nad5	1918	640	CGU->UGU	Arg->Cys	CTCTATTTGTGACCTTTTCT	C	GTATGTGGGACTTTCTATCT	0.999
nad5	1958	653	UCG->UUG	Ser->Leu	TTCTTGGGTAGATAATCGAT	C	GTCTTTCATTTGGATAGTGA	0.991
nad6	26	9	CCG->CUG	Pro->Leu	ACTTTCTGTTTTGTCGAGCC	C	GGCTTTGGTCTCTGGTTTGA	1
nad6	88	30	CCC->UUC	Pro->Phe	CGGTACATTCCGTTTTGTTT	C	CCATCCCAGTCTTTTGCAAC	0.995
nad6	89	30	CCC->UUC	Pro->Phe	GGTACATTCCGTTTTGTTTC	C	CATCCCAGTCTTTTGCAACA	0.997
nad6	95	32	CCA->CUA	Pro->Leu	TTCCGTTTTGTTTCCCATCC	C	AGTCTTTTGCAACACTTCAG	0.996
nad6	146	49	UCC->UUC	Ser->Phe	TTTGTTAGGTCTCGACTTTT	C	CGCTATGATCTTCCCAGTAG	1
nad6	161	54	CCA->CUA	Pro->Leu	CTTTTCCGCTATGATCTTCC	C	AGTAGTTTATATAGGAGCTA	0.995
nad6	191	64	UCA->UUA	Ser->Leu	TATAGGAGCTATAGCCGTTT	C	ATTCCTATTCGTTGTTATGA	0.999
nad6	569	190	UCU->UUU	Ser->Phe	CCGACGAAATGCTATTGATT	C	TAGAAGGACTATAATGAGGA	0.999
nad6	625	209	CGG->UGG	Arg->Trp	TCACGATCTACGTCAGGTAT	C	GGAGATTGATTGGTTCGAAT	0.933
nad6	652	218	CGU->UGU	Arg->Cys	TGATTGGTTCGAATCCAATT	C	GTGAGATGGCAGTGAGATAT	0.961
nad7	38	13	UCG->UUG	Ser->Leu	ACAAATCAAAAATTTCACTT	C	GAATTTCGGACCTCAACATC	0.998
nad7	45	15	UUC->UUU	Phe->Phe	AAAAATTTCACTTCGAATTT	C	GGACCTCAACATCCTGCTGC	0.997
nad7	77	26	UCA->UUA	Ser->Leu	TCCTGCTGCTCATGGTGTTT	C	ACGATTAGTATTGGAAATGA	0.999
nad7	224	75	ACG->AUG	Thr->Met	TCGTTTAGACTATGTTTCTA	C	GATGGCCCAAGAACACGCTC	1
nad7	244	82	CAU->UAU	His->Tyr	CGATGGCCCAAGAACACGCT	C	ATTCTTCAGCCGTAGAGAGA	0.999
nad7	251	84	UCA->UUA	Ser->Leu	CCAAGAACACGCTCATTCTT	C	AGCCGTAGAGAGACTTTTGA	0.993
nad7	316	106	CGU->UGU	Arg->Cys	AATATATACGAGTGTTATTC	C	GTGAAATAACTCGAATTTCA	0.997
nad7	335	112	UCA->UUA	Ser->Leu	CCGTGAAATAACTCGAATTT	C	AAATCATTCACTTGCTTTAA	0.999
nad7	344	115	UCA->UUA	Ser->Leu	AACTCGAATTTCAAATCATT	C	ACTTGCTTTAACTACTCATG	0.999
nad7	445	149	CCG->UCG	Pro->Ser	TGGAATTCTATGAAAGAGTC	C	CGGGAGCCAGGATGCATGCC	1
nad7	533	178	UCC->UUC	Ser->Phe	ATGTCGAGATATTGATTCCT	C	CACACAACAATTTGCTTCTC	0.998
nad7	578	193	UCA->UUA	Ser->Leu	CGACGAATTAGAAGAGATGT	C	AACCGGCAACCGTATCTGGA	1
nad7	679	227	CCA->UCA	Pro->Ser	GTGGTGTAATGTTAAGAGGT	C	CAGGGGTATGCTGGGATTTG	0.995
nad7	769	257	CGC->UGC	Arg->Cys	CAGTAGGTACCAGAGGAGAT	C	GCTATGATCGTTACTGTATC	1
nad7	789	263	AUC->AUU	Ile->Ile	CGCTATGATCGTTACTGTAT	C	CGTATCGAAGAGATGCGACA	0.922
nad7	926	309	UCA->UUA	Ser->Leu	GAAACTATCCATGGAATCCT	C	AATTCACCATTTCGAACCTT	0.999
nad7	944	315	CCU->CUU	Pro->Leu	CTCAATTCACCATTTCGAAC	C	TTATACAGAAGGTTTTTCCG	0.999
nad7	973	325	CCU->UCU	Pro->Ser	AAGGTTTTTCCGTACCAGCT	C	CTTCTACCTATACCGCAGTT	0.999
nad7	1057	353	CGU->UGU	Arg->Cys	GAAGCAATCGTCCTTACCGT	C	GTAAAATAAGAGCACCTGGC	0.995
nad7	1079	360	UCU->UUU	Ser->Phe	TAAAATAAGAGCACCTGGCT	C	TGCCCATTCACAAGGACTCG	0.999
nad7	1088	363	UCA->UUA	Ser->Leu	AGCACCTGGCTCTGCCCATT	C	ACAAGGACTCGATTCTATGT	0.996
nad7	1103	368	UCU->UUU	Ser->Phe	CCATTCACAAGGACTCGATT	C	TATGTCCAAACATCACATGC	0.999
nad7	1124	375	CCA->CUA	Pro->Leu	TATGTCCAAACATCACATGC	C	AGCAGATGTGGTCACCATCA	1
nad7	1137	379	GUC->GUU	Val->Val	CACATGCCAGCAGATGTGGT	C	ACCATCATAGGTACTCAAGA	0.941
nad7	1166	389	UCU->UUU	Ser->Phe	AGGTACTCAAGATATTGTGT	C	TGGAGAGGTGGATAGATAGG	1
nad9	92	31	UCU->UUU	Ser->Phe	TTCGGAACATGGGAATAGAT	C	TGATACCAATACGGACTACC	0.982
nad9	113	38	CCA->CUA	Pro->Leu	TGATACCAATACGGACTACC	C	ATTTCAATTGTTGTGCTTTC	1
nad9	298	100	CCG->UCG	Pro->Ser	ACGAAGTAACACGAATATCT	C	CGGTAGTCAGTCTATTTCCA	0.996
nad9	328	110	CGG->UGG	Arg->Trp	GTCTATTTCCATCAGCCGGC	C	GGTGGGAGCGAGAAGTTTGG	1
nad9	368	123	UCC->UUC	Ser->Phe	GGATATGTTTGGTGTTTCTT	C	CATCAATCATCCGGATCTAC	1
rpl16	104	35	ACU->AUU	Thr->Ile	TGGTTTTGGAAGATATGGCA	C	TAAAAGTTTACGAGCTGGTC	0.961
rpl16	232	78	CUC->UUC	Leu->Phe	GTAAGATATGGGTAAGAGTT	C	TCGCGGATCTCCCTATTACC	0.998
rpl16	321	107	UCC->UCU	Ser->Ser	GGTTGGATTGCTCGTGTGTC	C	ACGGGACAAATCCCATTTGA	0.903
rpl16	335	112	CCA->CUA	Pro->Leu	TGTGTCCACGGGACAAATCC	C	ATTTGAAATGGATGGTGTTA	0.999
rpl16	401	134	CCA->CUA	Pro->Leu	TACATTAGCGGCGCATAAAC	C	ATGTTCGTCAACCAAGTTTG	0.997
rpl16	407	136	UCG->UUG	Ser->Leu	AGCGGCGCATAAACCATGTT	C	GTCAACCAAGTTTGTTCAGT	0.992
rpl5	7	3	CCA->UCA	Pro->Ser	AGAAAAGCAAACTCATGTTT	C	CACTCCATTTTCATTACGAA	0.95
rpl5	35	12	UCA->UUA	Ser->Leu	TTTTCATTACGAAGATGTTT	C	ACGTCAAGATCCGTTGCTCA	0.903
rpl5	47	16	CCG->CUG	Pro->Leu	AGATGTTTCACGTCAAGATC	C	GTTGCTCAAACCGAATCACG	0.971
rpl5	59	20	CCG->CUG	Pro->Leu	TCAAGATCCGTTGCTCAAAC	C	GAATCACGCCAACGTTATGG	0.998
rpl5	64	22	CAC->UAC	His->Tyr	ATCCGTTGCTCAAACCGAAT	C	ACGCCAACGTTATGGAAGTT	0.94
rpl5	169	57	CCG->UCG	Pro->Ser	GAAAATTGGCTATGGAGATT	C	CGTGCGGTCAGAAATTAATA	0.969
rpl5	518	173	CCG->CUG	Pro->Leu	ACAAGATGAGACTTTACTAC	C	GTGGAGCGGCTTTTTGCAAA	0.999
rps1	42	14	UCC->UCU	Ser->Ser	TCATTTCCAAGATCTAATTC	C	AGTTTTTTCTTATGTAGTGG	0.938
rps1	158	53	CCU->CUU	Pro->Leu	AATTTGTATGCAAGATGAGC	C	TACAGGAGTGCCAATCAACC	0.996
rps1	209	70	UCC->UUC	Ser->Phe	GTTTGAGAATAAGGTAGGAT	C	CCTGGATCTAGTGGCCGGTG	0.901
rps12	71	24	UCG->UUG	Ser->Leu	CACGGACCGTACTCGAGCTT	C	GGATCAATGTCCCCAGAAGC	1
rps12	100	34	CGC->UGC	Arg->Cys	GTCCCCAGAAGCAAGGAGTA	C	GCCCGCGTGTTTCAACGAGA	0.999
rps12	104	35	CCG->CUG	Pro->Leu	CCAGAAGCAAGGAGTACGCC	C	GCGTGTTTCAACGAGAACAC	1
rps12	196	66	CAC->UAC	His->Tyr	ATCGACATGATATATTTGCT	C	ACATTCCGGGCGAAGGTCAT	0.998
rps12	269	90	UCG->UUG	Ser->Leu	AGGAGGTAGAGTGAAAGATT	C	GCCAGGTGTGAAATCCCATT	0.997
rps12	284	95	UCC->UUC	Ser->Phe	AGATTCGCCAGGTGTGAAAT	C	CCATTGTATTCGAGGAGTCA	1
rps3	69	23	UUC->UUU	Phe->Phe	AGTTCAGATTCTTCTTGGTT	C	AGTGATTATTATTATGGTAA	0.985
rps3	1061	354	CCA->CUA	Pro->Leu	CGGTGCTACCTTCTTCTTTC	C	AAGGGATGGAGTAAGAGTAA	0.98
rps3	1394	465	CCG->CUG	Pro->Leu	TGTTTATCAAAGTGCTTCTC	C	GATTGCTCAAGACATATCTT	0.999
rps3	1421	474	CCG->CUG	Pro->Leu	TCAAGACATATCTTTTCAAC	C	GAAAAACAAAAGAAGATCAT	1
rps4	61	21	CGG->UGG	Arg->Trp	GTCTACTTTCAGGAAATGTT	C	GGAAGAGAGAACTTACAATA	0.991
rps4	145	49	CCG->UCG	Pro->Ser	ATATTAAGAAAAAGATTTAT	C	CGAGAAAAAATCGTAACAGT	0.988
rps4	196	66	CCC->UCC	Pro->Ser	TACAAACTACACGAAAGTTG	C	CCCTTTTTCATGGGAATTTA	0.999
rps4	205	69	CAU->UAU	His->Tyr	CACGAAAGTTGCCCCTTTTT	C	ATGGGAATTTACCCATCACA	0.992
rps4	278	93	CCA->CUA	Pro->Leu	TATCCCTTTTCTACTCAATC	C	AGAAACAAGATTGGACGTTA	0.995
rps4	302	101	CCG->CUG	Pro->Leu	AACAAGATTGGACGTTATTC	C	GGTTCGTCTCCATTTTTGTG	0.999
rps4	347	116	CCG->CUG	Pro->Leu	TATTCCTCAAGCAAGGCAGC	C	GATAAGTCATCGAAAAGTGT	0.985
rps4	494	165	UCA->UUA	Ser->Leu	ATCTTTCTATATCAAAATAT	C	AGTTGAAAAAATAATAGGAA	0.953
rps4	977	326	UCG->UUG	Ser->Leu	CGAACTACCTACTCATTATT	C	GGAGGTCAATCATAGAACAC	0.946
rps4	1013	338	UCU->UUU	Ser->Phe	AACACTAAAAGCTGTGGTAT	C	TTATGGACCTAACATAGATC	0.992
rps4	1064	355	CCA->CUA	Pro->Leu	CGACATAAGATTGAAAGATC	C	AAACCTTCCTCTTCGGAGCG	0.991
rps4	1073	358	CCU->CUU	Pro->Leu	ATTGAAAGATCCAAACCTTC	C	TCTTCGGAGCGGAAACGGAC	0.996
rps4	1078	360	CGG->UGG	Arg->Trp	AAGATCCAAACCTTCCTCTT	C	GGAGCGGAAACGGACGTGGC	0.995
rps7	332	111	UCA->UUA	Ser->Leu	GATAAGCTTAGAGAAGTGTT	C	ATTTGATGAGATACTGGATG	0.931
sdh4	155	52	CCA->CUA	Pro->Leu	AAGAATTACTGCAGCTTTCC	C	ACTCCCTTTGATTATCATAT	0.993
sdh4	203	68	CCA->CUA	Pro->Leu	AGTCTCTTCCACTTTCCTAC	C	AAATCTCTCTGTATTCTGGC	0.979
sdh4	259	87	CAU->UAU	His->Tyr	TCGAAGAGATTATGGCAGAT	C	ATGTTCACCAAGAAATGACC	0.998
sdh4	353	118	UCU->UUU	Ser->Phe	TGTTTTCTTGTCTCTCGTTT	C	TTTTCTGAACAAATCGAAGA	0.946
